# Supplementary material for: The pentafluorophenyl group as π-acceptor for anions: a case study
Source: PubMed Central journal article supplement (PMC5586208; doi:10.1039/c4sc02762k), 2014-10-16
Supplement: SC-006-C4SC02762K-s001.pdf [file SC-006-C4SC02762K-s001.pdf]

Supporting Information for

## The pentafluorophenyl group as $\pi$ -acceptor for Anions: A case study

Michael Giese, Markus Albrecht\*, Arto Valkonen and Kari Rissanen\*

### I. Synthetic Procedures and Characterization of Compounds

#### General

All commercially available reagents were used as received. Solvents were distilled before use. The obtained compounds were fully characterized by standard analytical methods using a Varian Mercury 300 NMR spectrometer for  $^1\text{H}$ - (300 MHz) and  $^{19}\text{F}$ -NMR spectra (282 MHz) in deuterio solvents. Mass spectrometric data were recorded on Finnigan SSQ 7000 and Thermo Deca XP as EI (70 eV) or ESI. IR spectra were obtained by a PerkinElmer FTIR spectrometer Spektrum 100 in KBr pellets (4000-650  $\text{cm}^{-1}$ ) and a CHN-O-Rapid Vario EL from Heraeus was used for elemental analysis. Melting points were taken by a Büchi B-540 without correction.

#### Synthesis and Characterisation of Compounds 1-20

Triethyl-fluorobenzylammonium Salts:

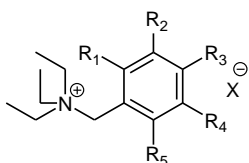

**1:**  $\text{R}_1, \text{R}_2, \text{R}_4, \text{R}_5 = \text{F}; \text{R}_3 = \text{H}; \text{X} = \text{Br}^-$

**2:**  $\text{R}_1, \text{R}_2, \text{R}_3, \text{R}_4 = \text{F}; \text{R}_5 = \text{H}; \text{X} = \text{Br}^-$

**3:**  $\text{R}_1, \text{R}_3, \text{R}_5 = \text{F}; \text{R}_2, \text{R}_4 = \text{H}; \text{X} = \text{Br}^-$

**4:**  $\text{R}_2, \text{R}_3, \text{R}_4 = \text{F}; \text{R}_1, \text{R}_5 = \text{H}; \text{X} = \text{Br}^-$

**5:**  $\text{R}_2, \text{R}_4 = \text{F}; \text{R}_1; \text{R}_3, \text{R}_5 = \text{H}; \text{X} = \text{Br}^-$

**6:**  $\text{R}_1\text{-R}_5 = \text{F}; \text{X} = \text{I}^-$

The triethyl-fluorobenzylammonium salts were synthesized following the general procedure. In a typical procedure 200 mg of triethylamine (1.0 eq., 1.98 mmol) were dissolved in 20 mL of chloroform. Then the corresponding amount of the fluorobenzyl halide (1.0 eq.) dissolved in 10 mL of chloroform was added and the reaction mixture was stirred for 12 h at room temperature. The solvent was removed under reduced pressure and the remaining solid was dried in vacuo.

#### 2,3,5,6-Tetrafluorobenzyl-triethylammonium bromide (1)

230 mg colorless solid ( $M = 343.04 \text{ g/mol}$ , 0.70 mmol, 85 %); **mp:** 249 °C

$^1\text{H-NMR}$  (300 MHz, MeOD):  $\delta$  (ppm) = 7.83-7.71 (m, 1H,  $\text{H}_{\text{aryl}}$ ), 4.73 (s, 2H,  $\text{H}_{\text{benzyl}}$ ), 3.44 (q,  $J = 7.2 \text{ Hz}$ , 6H,  $\text{CH}_2$ ), 1.45 (t,  $J = 7.2 \text{ Hz}$ , 9H,  $\text{CH}_3$ ).

$^{19}\text{F-NMR}$  (300 MHz, MeOD):  $\delta$  (ppm) = -138.18 (m, 2F,  $\text{F}_{\text{ortho}}$ ), -139.01 (m, 2F,  $\text{F}_{\text{meta}}$ ).

**MS** (ESI):  $m/z$  (%) = positive: 264.8 (12,  $[\text{M}]^+$ ,  $\text{C}_{13}\text{H}_{18}\text{NF}_4^+$ ), 607.7 (100,  $[\text{M}_2\text{Br}]^+$ ,  $\text{C}_{23}\text{H}_{36}\text{N}_2\text{F}_8\text{Br}^+$ ).

**IR** (KBr):  $\nu$  ( $\text{cm}^{-1}$ ) = 2969 (m), 1804 (w), 2677 (w), 1810 (w), 1749 (w), 1617 (w), 1507 (vs), 1457 (m), 1398 (m), 1378 (m), 1316 (m), 1259 (s), 1191 (s), 1159 (m), 1112 (w), 1031 (m), 1008 (vs), 940 (m), 902 (s), 846 (m), 815 (m), 799 (m), 749 (w), 713 (s), 680 (w), 658 (m).

**Elemental Analysis** (%): calculated  $\text{C}_{13}\text{H}_{18}\text{F}_4\text{NBr}$ : C 45.36, H 5.27, N 4.07; found: C 45.08, H 5.37, N 4.09.

Two sets of colorless crystals from DMF/Et<sub>2</sub>O (see Table S2 and Table S3).

### **2,3,4,5-Tetrafluorobenzyl-triethylammonium bromide (2)**

290 mg colorless solid (M = 343.04 g/mol, 0.80 mmol, 99%); **mp**: 282 °C

**<sup>1</sup>H-NMR** (400 MHz, MeOD):  $\delta$  (ppm) = 7.54-7.47 (m, 1H, H<sub>aryl</sub>), 4.60 (s, 2H, H<sub>benzyl</sub>), 3.35 (q, J = 7.2 Hz, 6H, CH<sub>2</sub>), 1.41 (t, J = 7.2 Hz, 9H, CH<sub>3</sub>).

**<sup>19</sup>F-NMR** (400 MHz, MeOD):  $\delta$  (ppm) = -137.29 (m, 1F), -139.67 (m, 1F), -153.54 (m, 1F), -156.36 (m, 1F).

**MS** (ESI): m/z (%) = positive: 264.33 (18, [M]<sup>+</sup>, C<sub>13</sub>H<sub>18</sub>NF<sub>4</sub><sup>+</sup>), 607.67 (100, [M<sub>2</sub>Br]<sup>+</sup>, C<sub>23</sub>H<sub>36</sub>N<sub>2</sub>F<sub>8</sub>Br<sup>+</sup>).

**IR** (KBr):  $\nu$  ( $\text{cm}^{-1}$ ) = 3465 (w), 2986 (m), 2758 (w), 2673 (w), 2487 (w), 2080 (w), 1991 (w), 1839 (w), 1633 (m), 1527 (vs), 1493 (vs), 1405 (m), 1365 (s), 1311 (m), 1270 (m), 1224 (m), 1179 (m), 1117 (vs), 1058 (vs), 1025 (vs), 946 (vs), 895 (s), 798 (vs), 716 (s), 664 (m).

**Elemental Analysis** (%): calculated  $\text{C}_{13}\text{H}_{18}\text{F}_4\text{NBr}$ : C 45.36, H 5.27, N 4.07; found: C 45.16, H 5.29, N 4.04.

Colorless crystals from DMF/Et<sub>2</sub>O (see Table S4).

### **2,4,6-Trifluorobenzyl-triethylammonium bromide (3)**

350 mg colorless solid (M = 325.07 g/mol, 0.77 mmol, 86%); **mp**: 215 °C

**<sup>1</sup>H-NMR** (300 MHz, MeOD):  $\delta$  (ppm) = 7.14 (t, J = 8.9 Hz, 2H, H<sub>aryl</sub>), 4.58 (s, 2H, H<sub>benzyl</sub>), 3.38 (q, J = 7.2 Hz, 6H, CH<sub>2</sub>), 1.42 (t, J = 7.2 Hz, 9H, CH<sub>3</sub>).

**<sup>19</sup>F-NMR** (300 MHz, MeOD):  $\delta$  (ppm) = -103.18 (m, 1F, F<sub>para</sub>), -106.25 (m, 2F, F<sub>ortho</sub>).

**MS** (ESI): m/z (%) = positive: 246.7 (12, [M]<sup>+</sup>, C<sub>13</sub>H<sub>19</sub>F<sub>3</sub>N<sup>+</sup>), 571.7 (100, [M<sub>2</sub>Br]<sup>+</sup>, C<sub>26</sub>H<sub>38</sub>F<sub>6</sub>N<sub>2</sub>Br<sup>+</sup>).

**IR** (KBr):  $\nu$  ( $\text{cm}^{-1}$ ) = 2997 (m), 2967 (m), 2678 (w), 2086 (w), 1740 (m), 1671 (w), 1630 (s), 1600 (s), 1470 (s), 1443 (s), 1417 (w), 1399 (m), 1374 (m), 1337 (w), 1316 (w), 1272 (m), 1211 (m), 1187 (m), 1160 (m), 1122 (vs), 1054 (s), 1020 (s), 995 (s), 939 (m), 886 (vs), 806 (s), 791 (s), 731 (m), 670 (w).

**Elemental Analysis** (%): calculated  $\text{C}_{13}\text{H}_{19}\text{F}_3\text{NBr}$ : C 47.87, H 5.87, N 4.29; found: C 48.08, H 6.02, N 4.35.

Colorless crystals from DMF/EE (see Table S5).

### **3,4,5-Trifluorobenzyl-triethylammonium bromide (4)**

270 mg colorless solid (M = 325.07 g/mol, 0.83 mmol, 93%); **mp**: 227 °C

**<sup>1</sup>H-NMR** (300 MHz, MeOD):  $\delta$  (ppm) = 7.42 (t, J = 7.5 Hz, 2H, H<sub>aryl</sub>), 4.50 (s, 2H, H<sub>benzyl</sub>), 3.36-3.28 (m, 6H, CH<sub>2</sub>), 1.42 (t, J = 7.3 Hz, 9H, CH<sub>3</sub>).

**<sup>19</sup>F-NMR** (300 MHz, MeOD):  $\delta$  (ppm) = -134.96 (m, 2F, F<sub>meta</sub>), -159.97 (m, 1F, F<sub>para</sub>).

**MS** (ESI): m/z (%) = positive: 246.5 (15, [M]<sup>+</sup>, C<sub>13</sub>H<sub>19</sub>F<sub>3</sub>N<sup>+</sup>), 571.4 (100, [M<sub>2</sub>Br]<sup>+</sup>, C<sub>26</sub>H<sub>38</sub>F<sub>6</sub>N<sub>2</sub>Br<sup>+</sup>).

**IR** (KBr):  $\nu$  ( $\text{cm}^{-1}$ ) = 3486 (w), 3418 (w), 2977 (m), 2038 (w), 1737 (w), 1614 (m), 1531 (vs), 1453 (s), 1397 (m), 1352 (s), 1277 (w), 1237 (m), 1180 (m), 1150 (m), 1045 (vs), 939 (w), 860 (m), 789 (vs), 709 (m), 669 (m).

**Elemental Analysis** (%): calculated  $\text{C}_{13}\text{H}_{19}\text{F}_3\text{NBr}$ : C 47.87, H 5.87, N 4.29; found: C 47.30, H 5.73, N 4.35.

Colorless crystals from DMF/EE (see Table S6).

### 3,5-Difluorobenzyl-triethylammonium bromide (5)

265 mg colorless solid (M = 307.07 g/mol, 0.80 mmol, 89%); mp: 241 °C

<sup>1</sup>H-NMR (300 MHz, MeOD): δ (ppm) = 7.26-7.20 (m, 3H, H<sub>aryl</sub>), 4.52 (s, 2H, H<sub>benzyl</sub>), 3.37-3.27 (m, 6H, CH<sub>2</sub>), 1.42 (t, J = 7.3 Hz, 9H, CH<sub>3</sub>).

<sup>19</sup>F-NMR (300 MHz, MeOD): δ (ppm) = -109.50 (m, 2F, F<sub>meta</sub>).

MS (ESI): m/z (%) = positive: 228.4 (12, [M]<sup>+</sup>, C<sub>13</sub>H<sub>20</sub>F<sub>2</sub>N<sup>+</sup>), 535.5 (100, [M<sub>2</sub>Br]<sup>+</sup>, C<sub>26</sub>H<sub>40</sub>F<sub>4</sub>N<sub>2</sub>Br<sup>+</sup>).

IR (KBr): ν (cm<sup>-1</sup>) = 3006 (s), 2762 (w), 1797 (w), 1620 (s), 1596 (vs), 1517 (w), 1454 (vs), 1403 (m), 1367 (w), 1314 (vs), 1283 (m), 1232 (w), 1177 (m), 1130 (vs), 967 (s), 900 (s), 867 (s), 800 (vs), 719 (m), 661 (m).

Elemental Analysis (%): calculated C<sub>13</sub>H<sub>20</sub>F<sub>2</sub>NBr: C 50.66, H 6.54, N 4.54; found: C 50.49, H 6.39, N 4.53.

Colorless crystals from DMF/EE (see Table S7).

### Pentafluorobenzyl-triethylammonium iodide (6)

300 mg colorless solid (M = 409.03 g/mol, 0.73 mmol, 92%); mp: 176 °C

<sup>1</sup>H-NMR (300 MHz, CDCl<sub>3</sub>): δ (ppm) = 4.85 (s, 2H, H<sub>benzyl</sub>), 3.60 (q, J = 7.2 Hz, 6H, CH<sub>2</sub>), 1.52 (t, J = 7.2, 9H, CH<sub>3</sub>).

<sup>19</sup>F-NMR (300 MHz, CDCl<sub>3</sub>): δ (ppm) = -134.87 (m, 2F, F<sub>ortho</sub>), -146.04 (m, 1F, F<sub>para</sub>), -158.02 (m, 2F, F<sub>meta</sub>).

MS (ESI): m/z (%) = positive: 282.25 (100, [M]<sup>+</sup>, C<sub>13</sub>H<sub>17</sub>F<sub>5</sub>N<sup>+</sup>).

IR (KBr): ν (cm<sup>-1</sup>) = 2968 (w), 2761 (w), 2675 (w), 2179 (w), 2105 (w, brd), 1991 (w), 1953 (w), 1747 (w), 1657 (m), 1521 (vs), 1504 (vs), 1476 (s), 1455 (s), 1402 (s), 1381 (m), 1308 (m), 1261 (w), 1217 (w), 1160 (m), 1131 (s), 1074 (w), 1016 (vs), 979 (s), 897 (w), 862 (w), 796 (s), 744 (w), 731 (w), 685 (w), 669 (m).

Elemental Analysis (%): calculated C<sub>13</sub>H<sub>17</sub>NF<sub>5</sub>I: C 38.16, H 4.19, N 3.42; found: C 37.46, H 3.92, N 3.27.

Colorless crystals from DMF/Et<sub>2</sub>O (see Table S8).

## Dimethylbenzyl-fluorobenzylammonium Salts:

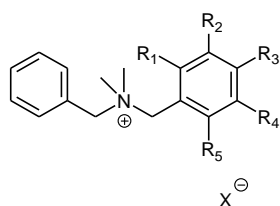

**7:** R<sub>1</sub>-R<sub>5</sub> = F; X = Br<sup>-</sup>

**8:** R<sub>1</sub>, R<sub>2</sub>, R<sub>4</sub>, R<sub>5</sub> = F; R<sub>3</sub> = H; X = Br<sup>-</sup>

**9:** R<sub>2</sub>, R<sub>3</sub>, R<sub>4</sub> = F; R<sub>1</sub>, R<sub>5</sub> = H; X = Br<sup>-</sup>

The dimethylbenzyl-fluorobenzyl ammonium salts were obtained by the following general approach. In a typical procedure 200 mg dimethylbenzyl amine (1.0 eq., 1.65 mmol) were placed in a round bottom flask and the corresponding amount of the fluorobenzylhalide (1.0 eq.) were directly added. The resulting colorless solid were recrystallized from ethanol.

### Dimethylbenzyl-pentafluorobenzylammonium bromide (7)

198 mg (M = 395.03 g/mol, 0.51 mmol, 65%); mp: 174 °C

<sup>1</sup>H-NMR (400 MHz, MeOD): δ (ppm) = 7.62-7.51 (m, 5H, H<sub>aryl</sub>), 4.84 (s, 2H, H<sub>benzyl</sub>), 4.71 (s, 2H, H<sub>benzyl</sub>), 3.03 (s, 6H, CH<sub>3</sub>).

<sup>19</sup>F-NMR (400 MHz, MeOD): δ (ppm) = -138.04 (m, 2F, F<sub>ortho</sub>), -151.26 (m, 1F, F<sub>para</sub>), -162.79 (m, 2F, F<sub>meta</sub>).

**MS** (ESI): m/z (%) = positive: 316.3 (62, [M]<sup>+</sup>, C<sub>15</sub>H<sub>13</sub>F<sub>5</sub>N<sup>+</sup>), 713.1 (100, [M<sub>2</sub>Br]<sup>+</sup>, C<sub>30</sub>H<sub>26</sub>BrF<sub>10</sub>N<sub>2</sub><sup>+</sup>).

**IR** (KBr): ν (cm<sup>-1</sup>) = 3439 (w), 3381 (w), 3013 (w), 2972 (w), 2324 (w), 2189 (w), 2094 (w), 2029 (w), 1997 (w), 1736 (w), 1660 (m), 1622 (w), 1587 (w), 1507 (vs), 1420 (m), 1363 (w), 1334 (w), 1307 (m), 1217 (w), 1132 (s), 1080 (w), 1044 (m), 979 (s), 936 (s), 915 (m), 860 (s), 820 (m), 780 (m), 759 (s), 720 (s), 679 (w).

**Elemental Analysis** (%): calculated C<sub>16</sub>H<sub>13</sub>BrF<sub>5</sub>N: C 48.50, H 3.82, N 3.54; found: C 47.82, H 4.03, N 3.49.

Colorless crystals from DMF/Et<sub>2</sub>O (see Table S9).

### Dimethylbenzyl-2,3,5,6-tetrafluorobenzylammonium bromide (8)

267 mg colorless solid (M = 378.20 g/mol, 0.71 mmol, 85%) mp: 190 °C

<sup>1</sup>H-NMR (300 MHz, MeOD): δ (ppm) = 7.85-7.73 (m, 1H, H<sub>aryl</sub>), 7.66-7.51 (m, 5H, H<sub>aryl</sub>), 4.84 (s, 2H, H<sub>benzyl</sub>), 4.75 (s, 2H, H<sub>benzyl</sub>), 3.06 (s, 6H, CH<sub>3</sub>).

<sup>19</sup>F-NMR (300 MHz, MeOD): δ (ppm) = -139.03 (m, 4F, F<sub>ortho</sub>, F<sub>meta</sub>).

**MS** (ESI): m/z (%) = positive: 298.2 (100, [M]<sup>+</sup>, C<sub>16</sub>H<sub>16</sub>F<sub>4</sub>N<sup>+</sup>).

**IR** (KBr): ν (cm<sup>-1</sup>) = 3061 (w), 3021 (w), 2965 (w), 2323 (w), 2167 (w), 2068 (w), 1987 (w), 1928 (w), 1757 (w), 1611 (w), 1503 (vs), 1455 (m), 1393 (m), 1363 (m), 1334 (w), 1264 (s), 1218 (w), 1178 (s), 1121 (w), 1082 (w), 1037 (m), 985 (s), 930 (m), 858 (vs), 823 (s), 781 (m), 762 (s), 717 (vs), 660 (m).

**Elemental Analysis** (%): calculated C<sub>15</sub>H<sub>16</sub>BrF<sub>4</sub>N: C 50.81, H 4.26, N 3.70; found: C 50.25, H 4.24, N 3.69.

Colorless crystals from MeOH/Et<sub>2</sub>O (see Table S10).

### Dimethylbenzyl-3,4,5-trifluorobenzylammonium bromide (9)

177 mg colorless solid (M = 360.21 g/mol, 0.49 mmol, 63%); mp: 212 °C

<sup>1</sup>H-NMR (300 MHz, MeOD): δ (ppm) = 7.63-7.49 (m, 7H, H<sub>aryl</sub>), 4.67 (s, 2H, H<sub>benzyl</sub>), 4.67 (s, 2H, H<sub>benzyl</sub>), 3.01 (s, 6H, CH<sub>3</sub>).

<sup>19</sup>F-NMR (300 MHz, MeOD): δ (ppm) = -135.09 (m, 2F, F<sub>meta</sub>), -160.06 (m, 1F, F<sub>para</sub>).

**MS** (EI, 70eV): m/z (%) = 280.3 (8, [M]<sup>+</sup>, C<sub>16</sub>H<sub>17</sub>F<sub>3</sub>N<sup>+</sup>), 639.5 (100, [M<sub>2</sub>Br]<sup>+</sup>, C<sub>32</sub>H<sub>34</sub>BrF<sub>6</sub>N<sub>2</sub><sup>+</sup>).

**IR** (KBr):  $\nu$  ( $\text{cm}^{-1}$ ) = 3035 (w), 2969 (m), 2885 (w), 2398 (w), 2318 (w), 2187 (w), 2111 (w), 1904 (w), 1597 (vs), 1468 (vs), 1402 (m), 1326 (s), 1219 (m), 1125 (vs), 1035 (w), 991 (s), 951 (w), 919 (w), 859 (vs), 823 (s), 774 (m), 744 (s), 700 (vs), 659 (w).

**Elemental Analysis** (%): calculated  $\text{C}_{16}\text{H}_{17}\text{BrF}_3\text{N}$ : C 53.35, H 4.76, N 3.89; found: C 53.23, H 4.61, N 3.85.

Colorless crystals from MeOH/Et<sub>2</sub>O (see Table S11).

### 3,4,5-Trifluorobenzyl-1,4-diazabicyclo[2.2.2]-octane chloride (10)

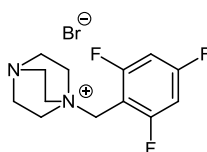

To a solution of 125 mg of 1,4-diazabicyclo[2.2.2]octane (1.0 eq., 1.10 mmol) in 20 mL of chloroform a solution of 250 mg 3,4,5-trifluorobenzyl bromide (1.0eq., 1.10 mmol) in 10 mL chloroform were added. The reactions mixture was stirred for 12 h at room temperature and the resulting precipitate was isolated by filtration, washed with chloroform and dried in vacuo.

199 mg colorless solid ( $M = 292.10$  g/mol, 1.03 mmol, 94%); **mp**: 307 °C

**<sup>1</sup>H-NMR** (300 MHz, MeOD):  $\delta$  (ppm) = 7.44 (t,  $J = 7.0$  Hz, 2H,  $H_{\text{aryl}}$ ), 4.51 (s, 2H,  $H_{\text{benzyl}}$ ), 3.42 (t,  $J = 6.9$  Hz, 6H,  $\text{CH}_2$ ), 4.18 (t,  $J = 6.9$  Hz, 1H,  $H_{\text{aryl}}$ ).

**<sup>19</sup>F-NMR** (300 MHz, MeOD):  $\delta$  (ppm) = -135.00 (m, 2F,  $F_{\text{meta}}$ ), -160.11 (m, 1F,  $F_{\text{para}}$ ).

**MS** (ESI):  $m/z$  (%) = positive: 257.6 (15,  $[\text{M}]^+$ ,  $\text{C}_{13}\text{H}_{16}\text{F}_3\text{N}_2^+$ ), 549.2 (100,  $[\text{M}_2\text{Cl}]^+$ ,  $\text{C}_{26}\text{H}_{32}\text{F}_6\text{N}_4\text{Cl}^+$ ).

**IR** (KBr):  $\nu$  ( $\text{cm}^{-1}$ ) = 3382 (m), 3011 (m), 2987 (m), 2918 (m), 2636 (w), 2322 (w), 2112 (w), 1943 (w), 1618 (m), 1533 (vs), 1490 (w), 1453 (s), 1414 (m), 1357 (s), 1324 (m), 1217 (m), 1189 (w), 1149 (m), 1078 (m), 1050 (vs), 1020 (vs), 987 (m), 944 (w), 892 (s), 841 (m), 788 (vs), 743 (s), 667 (m).

**Elemental Analysis** (%): calculated  $\text{C}_{13}\text{H}_{16}\text{F}_6\text{N}_2\text{Cl} \cdot 1/2\text{H}_2\text{O}$ : C 51.75, H 5.68, N 9.28; found: C 51.70, H 5.32, N 9.31.

Colorless crystals from MeOH/EE (see Table S12).

### 2-Amino-pentafluorobenzyl-pyridinium bromide (11)

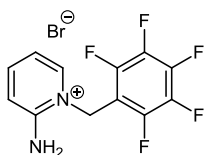

To a solution of 200 mg (1.0 eq., 0.79 mmol, 116  $\mu\text{L}$ ) pentafluorobenzyl bromide in 40 mL diethyl ether 74 mg (1.0 eq., 0.79 mmol) 2-amino pyridine were added. The reaction mixture was stirred for 48 h at room temperature. Then the solvent was removed under reduced pressure, washed with acetone and dried in vacuo.

54 mg colorless solid ( $M = 355.10$  g/mol, 0.15 mmol, 19%); **mp**: 237 °C

**<sup>1</sup>H-NMR** (300 MHz, MeOD):  $\delta$  (ppm) = 9.34 (s, 2H,  $H_{\text{amin}}$ ), 7.91 (d,  $J = 8.6$  Hz, 1H,  $H_{\text{aryl}}$ ), 7.65 (m, 1H,  $H_{\text{aryl}}$ ), 7.31 (d,  $J = 6.8$  Hz, 1H,  $H_{\text{aryl}}$ ), 6.75 (t,  $J = 6.9$  Hz, 1H,  $H_{\text{aryl}}$ ), 5.88 (s, 2H,  $H_{\text{benzyl}}$ ).

**<sup>19</sup>F-NMR** (300 MHz, MeOD):  $\delta$  (ppm) = -143.64 (m, 2F,  $F_{\text{ortho}}$ ), -154.28 (m, 1F,  $F_{\text{para}}$ ), -163.53 (m, 2F,  $F_{\text{meta}}$ ).

**MS** (EI, 70 eV):  $m/z$  (%) = 274.2 (51,  $[\text{M}-\text{H}]^+$ ,  $\text{C}_{12}\text{H}_7\text{F}_5\text{N}_2^+$ ), 181.2 (100,  $\text{C}_7\text{H}_2\text{F}_5^+$ ).

**IR** (KBr):  $\nu$  ( $\text{cm}^{-1}$ ) = 3193 (m), 3025 (s), 2737 (w), 2690 (w), 2433 (w), 2262 (w), 2089 (w), 1986 (w), 1861 (w), 1739 (m), 1658 (vs), 1582 (vs), 1522 (vs), 1499 (vs), 1453 (m), 1409 (w), 1374 (m), 1337 (w), 1276 (w), 1225 (m), 1127 (s), 1030 (s), 1009 (s), 965 (s), 918 (s), 859 (m), 802 (m), 755 (s), 728 (w), 698 (s), 671 (s).

**Elemental Analysis** (%): calculated  $\text{C}_{12}\text{H}_8\text{F}_5\text{N}_2\text{Br}$ : C 40.59, H 2.27, N 7.89; found: C 40.73, H 2.37, N 7.99.

Colorless crystals from DMF/Et<sub>2</sub>O (see Table S13).

### 3-Amino-pentafluorobenzyl-pyridinium bromide (12)

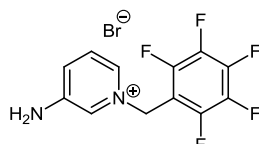

To a solution of 200 mg pentafluorobenzyl bromide (1.0 eq., 0.79 mmol, 116  $\mu\text{L}$ ) in 10 mL of tetrahydrofuran a solution of 77 mg 3-aminopyridine (1.0 eq., 0.79 mmol) in 10 mL of tetrahydrofuran was added. The mixture was stirred for 48 h at room temperature. The obtained precipitate was isolated by filtration, washed with tetrahydrofuran and dried in vacuo.

227 mg colorless solid ( $M = 355.10$  g/mol, 0.64 mmol, 78 %); **mp**: 208 °C

<sup>1</sup>H-NMR (300 MHz, MeOD):  $\delta$  (ppm) = 8.10 (s, 2H, H<sub>aryl</sub>), 7.67 (m, 2H, H<sub>aryl</sub>), 5.85 (s, 2H, H<sub>benzyl</sub>).

<sup>19</sup>F-NMR (300 MHz, MeOD):  $\delta$  (ppm) = -142.98 (m, 2F, F<sub>ortho</sub>), -153.25 (m, 1F, F<sub>para</sub>), -163.23 (m, 2F, F<sub>meta</sub>).

**MS** (EI, 70 eV):  $m/z$  (%) = 275.0 (2, [M]<sup>+</sup>, C<sub>12</sub>H<sub>7</sub>F<sub>5</sub>N<sub>2</sub><sup>+</sup>), 181.0 (100, C<sub>7</sub>H<sub>2</sub>F<sub>5</sub><sup>+</sup>).

**IR** (KBr):  $\nu$  ( $\text{cm}^{-1}$ ) = 3335 (w), 3288 (w), 3168 (w), 3050 (w), 2946 (w), 2865 (w), 2193 (w), 2094 (w), 1993 (w), 1964 (w), 1660 (w), 1631 (m), 1586 (m), 1503 (vs), 1435 (m), 1377 (w), 1333 (m), 1308 (w), 1284 (w), 1231 (w), 1196 (w), 1160 (m), 1133 (m), 1035 (s), 969 (m), 921 (s), 866 (m), 819 (w), 802 (m), 780 (m), 727 (m), 688 (s).

**Elemental Analysis** (%): calculated  $\text{C}_{12}\text{H}_8\text{F}_5\text{N}_2\text{Br}$ : C 49.59, H 2.27, N 7.89; found: C 49.55, H 2.25, N 7.93.

Colorless crystals from DMF/Et<sub>2</sub>O (see Table S14).

### Pentafluorobenzyl-4,4'-dipyridylium bromide (13)

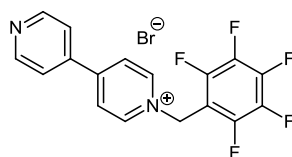

1.000 g Pentafluorobenzyl bromide (3.83 mmol, 1 eq., 580  $\mu\text{L}$ ) were added to a solution of 680 mg (4.35 mmol, 1.14 eq.) 4,4'-bipyridine in 100 mL toluene and heated to reflux for 2 h. Then 465 mg 4,4'-bipyridine (2.98 mmol, 0.78 eq.) were added and heated for additional 3.5 h. The colorless precipitate was isolated by filtration, washed with diethyl ether and dried in vacuo.

819 mg colorless solid ( $M = 417.17$  g/mol, 1.96 mmol, 51 %); **mp**: 225.0 °C

<sup>1</sup>H-NMR-Spektrum (CDCl<sub>3</sub>, 300 MHz):  $\delta$  (ppm): 9.59 (d, <sup>3</sup>J = 6.5 Hz, 2H, H<sub>aryl</sub>); 8.89 (dd, <sup>3</sup>J = 6.2 / 1.7 / 1.6 Hz, 2H, H<sub>aryl</sub>); 8.41 (d, <sup>3</sup>J = 6.5 Hz, 2H, H<sub>aryl</sub>); 7.70 (dd, <sup>3</sup>J = 6.2 / 1.7 / 1.6 Hz, H<sub>aryl</sub>); 6.70 (s, 2H, H<sub>benzyl</sub>).

<sup>19</sup>F-NMR-Spektrum (CDCl<sub>3</sub>, 300 MHz):  $\delta$  (ppm): -138.8 (m, 2F, F<sub>ortho</sub>); -147.8 (m, 1F, F<sub>para</sub>); -158.4 (m, 2F, F<sub>meta</sub>).

**MS** (ESI):  $m/z$  (%): 337.1 (1, [M]<sup>+</sup>, C<sub>17</sub>H<sub>10</sub>F<sub>5</sub>N<sub>2</sub><sup>+</sup>); 181.1 (100, C<sub>7</sub>H<sub>2</sub>F<sub>5</sub><sup>+</sup>).

**IR** (KBr)  $\tilde{\nu}$ ( $\text{cm}^{-1}$ ): 3488 (w), 3385 (w), 3122 (w), 3040 (w), 2990 (w), 2958 (w), 2325 (w),

2192 (w), 2077 (w), 2012 (w), 1972 (w), 1950 (w), 1640 (m), 1598 (m), 1548 (m), 1510 (vs), 1462 (m), 1430 (w), 1407 (m), 1377 (w), 1359 (w), 1340 (w), 1305 (m), 1280 (w), 1220 (m), 1176 (m), 1128 (s), 1032 (s), 964 (m), 923 (s), 870 (w), 836 (w), 814 (s), 767 (m), 746 (m), 714 (m), 669 (m).

**Elemental Analysis:** calculated  $C_{17}H_{10}BrF_5N_2 \cdot H_2O$ : C: 46.92 %H: 2.78 %N: 6.44 %; found: C: 46.94 %H: 2.77 %N: 6.51.

Colorless crystals from MeOH were obtained (see Table S15).

#### ***N*-Methyl-*N*-pentafluorobenzyl-imidazolium bromide (14)**

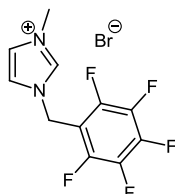

320 mg of *N*-methylimidazole (1.0 eq., 3.90 mmol) were dissolved in 20 mL of chloroform. Then 1.000 g of pentafluorobenzyl bromide (1.0 eq., 3.90 mmol) dissolved in 10 mL of chloroform were added and the reaction mixture was stirred for 12 h at room temperature. The solvent was removed under reduced pressure and the remaining solid was dried in vacuo.

1.32 g colorless solid ( $M = 343.09$  g/mol, 3.85 mmol, 99%); **mp**: 138 °C

**$^1H$ -NMR** (300 MHz, MeOD):  $\delta$  (ppm) = 7.65 (d,  $J = 16.1$  Hz, 2H, CH), 5.64 (s, 2H,  $H_{benzyl}$ ), 3.77 (s, 3H,  $CH_3$ ).

**$^{19}F$ -NMR** (300 MHz, MeOD):  $\delta$  (ppm) = -143.91 (m, 2F,  $F_{ortho}$ ), -154.37 (m, 1F,  $F_{para}$ ), -163.55 (m, 2F,  $F_{meta}$ ).

**MS** (ESI):  $m/z$  (%) = positive: 263.1 (100,  $[M]^+$ ,  $C_{11}H_8F_5N_2^+$ ).

**IR** (KBr):  $\nu$  ( $cm^{-1}$ ) = 3436 (w), 3126 (w), 3080 (m), 3050 (m), 2974 (m), 2842 (w), 2462 (w), 2237 (w), 2089 (w), 1993 (w), 1770 (w), 1663 (m), 1577 (w), 1548 (m), 1510 (vs), 1448 (m), 1434 (m), 1406 (m), 1349 (w), 1298 (m), 1224 (w), 1164 (vs), 1124 (s), 1025 (s), 969 (s), 921 (s), 888 (m), 790 (s), 727 (w), 707 (m), 678 (m).

**Elemental Analysis** (%): calculated  $C_{11}H_8F_5N_2Br$ : C 38.51, H 2.35, N 8.71; found: C 38.59, H 2.40, N 8.39.

Colorless crystals from MeOH/EE (see Table S16).

#### ***N,N*-Bis-pentafluorobenzyl-benzimidazolium bromide (15)**

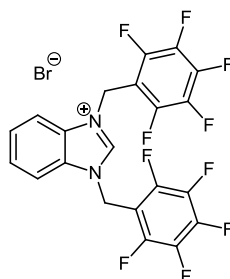

1.000 g Pentafluorobenzyl bromide (2.0 eq., 3.83 mmol, 580  $\mu$ L) were added to a solution of 225 mg benzimidazole (1.0 eq., 1.90 mmol) in 20 mL of toluene and heated to 110°C for 5 h. The colorless precipitate was removed by filtration. The solvent was removed from the filtrate under reduced pressure and the obtained colorless solid was recrystallized from 50 mL toluene and finally dried in vacuo.

244 mg colorless solid ( $M = 559.20$  g/mol, 0.44 mmol, 23%); **mp**: 194 °C

**$^1H$ -NMR** (300 MHz, MeOD):  $\delta$  (ppm) = 7.95 (m, 2H,  $H_{aryl}$ ), 7.79 (m, 2H,  $H_{aryl}$ ), 5.97 (s, 4H,  $H_{benzyl}$ ).

**<sup>19</sup>F-NMR** (300 MHz, MeOD):  $\delta$  (ppm) = -143.2 (m, 4F, F<sub>ortho</sub>), -153.9 (m, 2F, F<sub>para</sub>), -163.4 (m, 4F, F<sub>meta</sub>).

**MS** (ESI): m/z (%) = positive: 479.2 (15, [M]<sup>+</sup>, C<sub>21</sub>H<sub>9</sub>F<sub>10</sub>N<sub>2</sub><sup>+</sup>).

**IR** (KBr):  $\nu$  (cm<sup>-1</sup>) = 3109 (w), 3044 (w), 2934 (w), 2866 (m), 2752 (w), 2445 (w), 2085 (w), 2011 (w), 1870 (w), 1737 (w), 1655 (m), 1613 (w), 1556 (m), 1498 (vs), 1451 (w), 1423 (m), 1377 (m), 1307 (m), 1206 (m), 1165 (w), 1129 (s), 1035 (s), 963 (m), 927 (s), 791 (m), 765 (s), 731 (m), 683 (m).

**Elemental Analysis** (%): calculated C<sub>21</sub>H<sub>9</sub>F<sub>10</sub>N<sub>2</sub>Br · CH<sub>3</sub>C<sub>6</sub>H<sub>5</sub>: C 47.51, H 1.99, N 4.75; found: C 47.10, H 2.22, N 4.82.

Colorless crystals from MeOH/EE (see Table S17).

### 1,4-Dimethyl-4-pentafluorobenzyl piperazine (16)

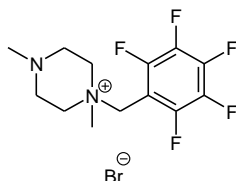

88 mg Dimethyl piperazine (1.0 eq., 0.77 mmol, 105  $\mu$ L) were added to a solution of 200 mg pentafluorobenzyl bromide (1.0 eq, 0.77 mmol, 116  $\mu$ L) in 10 mL of toluene and stirred for 12 h at room temperature. The colorless precipitate was isolated by filtration and dried in vacuo.

130 mg colorless solid (M = 370.04 g/mol, 0.35 mmol, 51%); **mp**: 270 °C under combustion

**<sup>1</sup>H-NMR** (300 MHz, MeOD):  $\delta$  (ppm) = 4.82 (s, 2H, H<sub>benzyl</sub>), 3.62 (m, 4H, CH<sub>2</sub>), 3.18 (s, 2H, CH<sub>3</sub>), 2.92 (m, 2H, CH<sub>2</sub>), 2.76 (m, 2H, CH<sub>2</sub>), 2.41 (s, 3H, CH<sub>3</sub>).

**<sup>19</sup>F-NMR** (300 MHz, MeOD):  $\delta$  (ppm) = -137.27 (m, 2F, F<sub>ortho</sub>), -151.03 (m, 1F, F<sub>para</sub>), -160.70 (m, 2F, F<sub>meta</sub>).

**MS** (ESI): m/z (%) = positive: 295.5 (100, [M]<sup>+</sup>, C<sub>13</sub>H<sub>16</sub>F<sub>5</sub>N<sub>2</sub><sup>+</sup>).

**IR** (KBr):  $\nu$  (cm<sup>-1</sup>) = 2969 (w), 2942 (w), 2804 (m), 2168 (w), 1983 (w), 1740 (w), 1656 (m), 1506 (vs), 1470 (s), 1442 (m), 1393 (m), 1333 (w), 1309 (m), 1288 (m), 1236 (w), 1209 (w), 1136 (s), 1085 (m), 1058 (m), 1002 (vs), 944 (vs), 908 (s), 825 (w), 791 (m), 751 (w), 689 (w).

**Elemental Analysis** (%): calculated C<sub>13</sub>H<sub>16</sub>BrF<sub>5</sub>N<sub>2</sub>: C 41.74, H 4.31, N 7.49; found: C 41.80, H 4.23, N 7.42.

Two sets of colorless crystals from MeOH/Et<sub>2</sub>O (see Table S18 and Table S19).

### 2-Hydroxy-*N,N*-dimethyl-*N*-pentafluorobenzyl-ethaneammonium bromide (17)

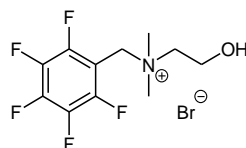

200 mg pentafluorobenzyl bromide (1.0 eq., 0.77 mmol, 116  $\mu$ L) were added to a solution of 69 mg (1.0 eq., 0.77 mmol, 77  $\mu$ L) *N,N*-dimethylamino ethanol in 20 mL of diethyl ether and stirred for 24 h at room temperature. The solvent was removed under reduced pressure and the remaining colorless solid was dried in vacuo.

164 mg colorless solid (M = 349.1 g/mol, 0.47 mmol, 61 %); **mp**: 194 °C

**<sup>1</sup>H-NMR** (300 MHz, MeOD):  $\delta$  (ppm) = 4.74 (s, 2H, H<sub>benzyl</sub>), 4.00 (t, J = 4.7 Hz, 2H, CH<sub>2</sub>), 3.60 (t, J = 4.7 Hz, 2H, CH<sub>2</sub>), 3.15 (s, 6H, CH<sub>3</sub>).

**<sup>19</sup>F-NMR** (300 MHz, MeOD):  $\delta$  (ppm) = -137.92 (m, 2F, F<sub>ortho</sub>), -151.34 (m, 1F, F<sub>para</sub>), -162.78 (m, 2F, F<sub>meta</sub>).

**MS** (ESI): m/z (%) = positive: 270.6 (100, [M]<sup>+</sup>, C<sub>11</sub>H<sub>13</sub>F<sub>5</sub>NO<sup>+</sup>).



**IR** (KBr):  $\nu$  (cm<sup>-1</sup>) = 3295 (m), 3009 (w), 2962 (w), 2846 (w), 2655 (w), 2185 (w), 2089 (w), 1978 (w), 1663 (m), 1528 (s), 1508 (vs), 1485 (s), 1451 (m), 1432 (m), 1381 (m), 1350 (w), 1332 (w), 1308 (m), 1261 (m), 1220 (w), 1164 (w), 1136 (s), 1088 (m), 1035 (s), 995 (m), 976 (s), 952 (vs), 899 (s), 844 (m), 800 (m), 765 (w), 726 (w), 677 (m).

**Elemental Analysis** (%): calculated C<sub>11</sub>H<sub>13</sub>BrF<sub>5</sub>NO: C 37.73, H 3.74, N 4.00; found: C 37.60, H 3.79, N 3.85.

Colorless crystals from MeOH/Et<sub>2</sub>O (see Table S20).

#### Tetramethyl-*bis*-(pentafluorobenzyl)ethyldiammonium dibromide (18)

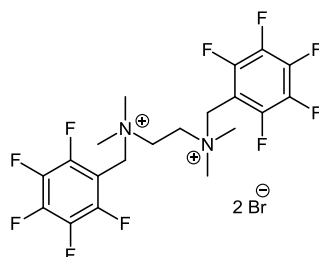

400 mg Pentafluorobenzyl bromide (2.0 eq., 1.54 mmol, 230  $\mu$ L) were dissolved in 10 mL of acetonitrile. To this solution 89 mg tetramethylethylene diamine (1.0 eq., 0.77 mmol, 115  $\mu$ L) were added and the mixture was stirred for 48 h at room temperature. The colorless precipitate was isolated by filtration and washed with three portions of ethyl acetate. Finally the product was dried under vacuo.

392 mg colorless solid (M = 635.98 g/mol, 0.62 mmol, 80%); **mp**: 205 °C

**<sup>1</sup>H-NMR** (300 MHz, D<sub>2</sub>O):  $\delta$  (ppm) = 4.80 (s, 4H, H<sub>benzyl</sub>), 4.20 (s, 4H, CH<sub>2</sub>), 3.19 (s, 12H, CH<sub>3</sub>).

**<sup>19</sup>F-NMR** (300 MHz, D<sub>2</sub>O):  $\delta$  (ppm) = -136.45 (m, 2F, F<sub>ortho</sub>), -146.86 (m, 1F, F<sub>para</sub>), -159.68 (m, 2F, F<sub>meta</sub>).

**MS** (ESI): m/z (%) = positive: 559.0 (100, [M+Br]<sup>+</sup>, C<sub>20</sub>H<sub>20</sub>BrF<sub>10</sub>N<sub>2</sub><sup>+</sup>).

**IR** (KBr):  $\nu$  (cm<sup>-1</sup>) = 3007 (w), 2954 (w), 2049 (w), 1982 (w), 1663 (m), 1508 (vs), 1476 (m), 1443 (m), 1403 (w), 1381 (w), 1357 (w), 1331 (w), 1308 (m), 1234 (w), 1135 (s), 1035 (s), 969 (vs), 924 (w), 904 (m), 892 (m), 876 (m), 816 (m), 766 (w), 721 (m), 682 (m).

**Elemental Analysis** (%): calculated C<sub>20</sub>H<sub>20</sub>Br<sub>2</sub>F<sub>10</sub>N<sub>2</sub>: C 37.64, H 3.16, N 4.39; found: C 37.60, H 3.25, N 4.38.

Three sets of colorless crystals from MeOH/Et<sub>2</sub>O (see Table S21, Table S22 and Table S23).

#### *N*-Pentafluorobenzyl-thiomorpholine (19)

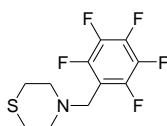

To a solution of 200 mg thiomorpholine (1.0 eq., 1.94 mmol) in 10 mL of chloroform a solution of 500 mg pentafluorobenzyl bromide (1.0 eq., 1.94 mmol) in 10 mL of chloroform was added. The mixture was stirred for 12 h at room temperature in the presence of K<sub>2</sub>CO<sub>3</sub> (800 mg, 3.0 eq., 5.82 mmol). The K<sub>2</sub>CO<sub>3</sub> was removed by filtration and the solvent was removed under reduced pressure. The remaining residue was dried in vacuo to a colorless solid.

320 mg colorless solid (M = 362.97 g/mol, 1.13 mmol, 58 %); **mp**: 178 °C

**<sup>1</sup>H-NMR** (CDCl<sub>3</sub>, 300 MHz, a9021240):  $\delta$  (ppm): 3,67(s, 2H, H<sub>benzyl</sub>); 2,74 (t, <sup>3</sup>J = 5,5 Hz, 4H, CH<sub>2</sub>); 2,65 (t, <sup>3</sup>J = 5,5 Hz, 4H, CH<sub>2</sub>).

**<sup>19</sup>F-NMR** (CDCl<sub>3</sub>, 300 MHz, a9021240):  $\delta$  (ppm): -141,0 (m, 2F, F<sub>ortho</sub>); -154,7 (m, 1F, F<sub>para</sub>); -162,0 (m, 2F, F<sub>meta</sub>).

**MS** (ESI): m/z (%): 284,1 (100, M + H<sup>+</sup>, C<sub>11</sub>H<sub>11</sub>F<sub>5</sub>NS<sup>+</sup>).

**IR** (KBr)  $\tilde{\nu}(cm^{-1})$ : 2944 (m), 2879 (w), 2819 (m), 2753 (w), 2702 (w), 2643 (w), 2168 (w), 2079 (w), 2011 (w), 1871 (w), 1707 (w), 1653 (m), 1585 (w), 1517 (s), 1493 (vs), 1456 (m), 1419 (m), 1405 (w), 1384 (w), 1324 (s), 1275 (w), 1209 (w), 1170 (w), 1126 (m), 1107 (s), 1034 (vs), 989 (s), 961 (s), 935 (m), 909 (s), 803 (w), 768 (w), 745 (s), 690 (m), 670 (m).

**Elemental Analysis** (%): calculated  $C_{11}H_{10}F_5NS$ : C 46.64, H 3.56, N 4.94; found: C 46.43, H 3.37, N 4.90. Colorless Crystals of the methylated bromide salt by slow diffusion of HBr into a solution of **19** in chloroform/methanol (see Table S24).

### (2-Dimethylaminoethyl)dimethyl(pentafluorobenzyl)ammonium chloride (**20**)

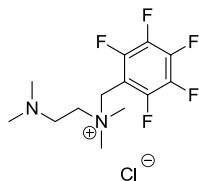

To a solution of *N,N,N,N*-tetramethylethylenediamine (0.492 g, 4.20 mmol) in chloroform (20 mL) was added an equimolar amount of pentafluorobenzyl chloride (900 mg, 4.20 mmol). After stirring the solution for 24 h at room temperature the obtained precipitate was filtered off and dried in vacuo.

1.115 g colorless solid ( $M = 332.11$  g/mol, 3.36 mmol, 80 %); **mp**: 109 °C

**<sup>1</sup>H-NMR** ( $CD_3OD$ , 300 MHz):  $\delta$  (ppm): 4,90 (s, 2H,  $C_6F_5CH_2$ ); 3,65 (t,  $^3J = 6,1$  Hz, 2H,  $CH_2$ ); 3,19 (s, 6H,  $CH_3$ ); 2,88 (t,  $^3J = 6,1$  Hz,  $CH_2$ ); 2,33 (s, 6H,  $CH_3$ )

**<sup>19</sup>F-NMR** ( $CD_3OD$ , 300 MHz):  $\delta$  (ppm): -138,0 (d,  $^3J = 18$  Hz, 2F,  $F_{ortho}$ ); -151,3 (t,  $^3J = 20$  Hz, 1F,  $F_{para}$ ); -162,8 (t,  $^3J = 18$  Hz, 2F,  $F_{meta}$ ).

**MS** (ESI):  $m/z$  (%): 297,2 (100,  $M^+$ ,  $C_{13}H_{18}F_5N_2^+$ ).

**IR** (KBr)  $\tilde{\nu}(cm^{-1})$ : 3466 (w), 3008 (w), 2979 (w), 2936 (m), 2840 (w), 2783 (w), 2442 (w), 2168 (w), 2030 (w), 1923 (w), 1728 (w), 1659 (m), 1506 (vs), 1460 (m), 1391 (w), 1368 (m), 1308 (m), 1270 (w), 1234 (w), 1161 (w), 1132 (s), 1082 (w), 1034 (s), 981 (s), 954 (m), 917 (m), 840 (m), 786 (w), 747 (vs), 664 (m).

**Elemental Analysis** (%): calculated  $C_{13}H_{18}ClF_5N_2$ : C 46.93, H 5.45, N 8.42; found: C 46.80, H 5.37, N 8.90.

Colorless Crystals wet MeOH/EE (see Table S25).

## II. Crystallographic data

### General

Single crystal X-ray data were collected at 123(2) K using a Bruker-Nonius KappaCCD diffractometer with APEX-II detector and graphite monochromatized Mo-K $\alpha$  ( $\lambda = 0.71073$  Å) radiation. COLLECT<sup>10a</sup> software was used for the data collection ( $\theta$  and  $\omega$  scans) and DENZO-SMN<sup>10b</sup> for the processing. The structures were solved by direct methods with SIR2004<sup>10c</sup> and refined by full-matrix least-squares methods with WinGX-software,<sup>10d</sup> which utilizes the SHELXL-97 module.<sup>10e</sup> Lorentzian polarization correction was applied on all data and absorption effects were corrected with multi-scan method (SADABS<sup>10f</sup>). All C–H hydrogen positions were calculated and refined as riding atoms, except for formyl H-atoms in DMF molecules. Hydrogen atoms bonded to O, N (except in **44**) or formyl C were found from Fourier maps and restrained (by DFIX,  $s = 0.02$ ) to a distance of 0.84 Å from O, 0.88 Å (amide, aromatic) or 0.91 Å from N or 0.95 Å from formyl C atoms. In structure **44** H atoms bonded to N were refined as riding atoms. Thermal parameters of H-atoms were set to 1.2 times that of the C and N or 1.5 times of O atom parameters. Crystallographic data and parameters are summarized in Tables S2-S26.

**Table S1.** Representative views of the analyzed anion- $\pi$  contacts, the corresponding CCDC numbers and the position number for the relative position of the anion in respect to the electron-deficient arene (see Table S27).

| # | Structure                                                                           | CCDC # / Crystallographic data | Pos. # |
|---|-------------------------------------------------------------------------------------|--------------------------------|--------|
| 1 | 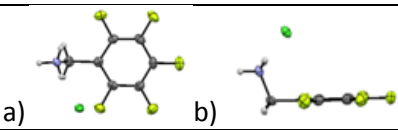 | CCDC-866136 <sup>1</sup>       | Cl12   |
| 2 |  | CCDC-752833 <sup>2</sup>       | Cl17   |
| 3 |  | CCDC-1005267<br>Table S12      | Cl16   |
| 4 |  | CCDC-883887 <sup>3</sup>       | Cl13   |
| 5 |  | CCDC-1005268<br>Table S25      | Cl14   |

|    |                 |                          |      |
|----|-----------------|--------------------------|------|
| 6  | <p>a)  b)  </p> | CCDC-866137 <sup>1</sup> | Cl15 |
| 7  | <p>a)  b)  </p> | CCDC-775333 <sup>4</sup> | Cl18 |
| 8  | <p>a)  b)  </p> | CCDC-745350 <sup>4</sup> | Cl19 |
| 9  | <p>a)  b)  </p> | CCDC-795076 <sup>2</sup> | Br20 |
|    | <p>a)  b)  </p> |                          | Br21 |
| 10 | <p>a)  b)  </p> | CCDC-752834 <sup>2</sup> | Br72 |
| 11 | <p>a)  b)  </p> | CCDC-817432 <sup>5</sup> | Br71 |
| 12 | <p>a)  b)  </p> | CCDC-817433 <sup>5</sup> | Br32 |
|    | <p>a)  b)  </p> |                          |      |
| 13 | <p>a)  b)  </p> | CCDC-817434 <sup>5</sup> | Br40 |
| 14 | <p>a)  b)  </p> | CCDC-1005269<br>Table S2 | Br35 |

|    |                                                                                                                                                    |                            |      |
|----|----------------------------------------------------------------------------------------------------------------------------------------------------|----------------------------|------|
| 15 |                                                                                                                                                    | CCDC-1005270<br>Table S5   | Br31 |
| 16 |                                                                                                                                                    | CCDC-752839 <sup>2</sup>   | Br61 |
| 17 |                                                                                                                                                    | CCDC-752838 <sup>2</sup>   | Br62 |
| 18 |                                                                                                                                                    | CCDC-1005271<br>Table S11  | Br22 |
| 19 |                                                                                                                                                    | CCDC-872224 <sup>6</sup>   | Br23 |
| 20 |                                                                                                                                                    | CCDC-936265 <sup>7</sup>   | Br25 |
| 21 |                                                                                                                                                    | CCDC-868496 <sup>8</sup>   | Br26 |
| 22 |                                                                                                                                                    | CCDC-1005272<br>Table S10  | Br27 |
| 23 | <p style="text-align: center;"> <chem>C1=CC=CC=C1CN1CCCC1.[B-](F)(F)(F)c2cc(F)c(F)c(F)c2</chem><br/> <math>2 \text{ Br} + \text{ EtOH}</math> </p> | See reference <sup>9</sup> | Br30 |

|    |  |                           |      |
|----|--|---------------------------|------|
| 24 |  | CCDC-1005273<br>Table S13 | Br34 |
| 25 |  | CCDC-1005274<br>Table S15 | Br36 |
| 26 |  | CCDC-817436 <sup>5</sup>  | Br37 |
| 27 |  | CCDC-1005275<br>Table S16 | Br39 |
| 28 |  | CCDC-1005276<br>Table S7  | Br41 |
| 29 |  | CCDC-1005277<br>Table S6  | Br42 |
| 30 |  | CCDC-817435 <sup>5</sup>  | Br43 |
| 31 |  | CCDC-1005278<br>Table S18 | Br44 |
| 32 |  | CCDC-1005279<br>Table S20 | Br47 |

|    |              |                           |                     |
|----|--------------|---------------------------|---------------------|
| 33 | <p>a) b)</p> | CCDC-1005280<br>Table S24 | Br56                |
| 34 | <p>a) b)</p> | CCDC-1005281<br>Table S3  | Br57                |
| 35 | <p>a) b)</p> | CCDC-752832 <sup>2</sup>  | Br60                |
| 36 | <p>a) b)</p> | CCDC-752831 <sup>2</sup>  | Br65                |
| 37 | <p>a) b)</p> | CCDC-779160 <sup>10</sup> | Br68                |
| 38 | <p>a) b)</p> | CCDC-752830 <sup>2</sup>  | Br58<br>Br59        |
| 39 | <p>a) b)</p> | CCDC-1005282<br>Table S19 | Br24                |
| 40 | <p>a) b)</p> | CCDC-1005283<br>Table S17 | Br69                |
| 41 | <p>a) b)</p> | CCDC-831306 <sup>10</sup> | Br76<br>Br77<br>I78 |

|    |                                                                                                                                                                                                                                                         |                            |              |
|----|---------------------------------------------------------------------------------------------------------------------------------------------------------------------------------------------------------------------------------------------------------|----------------------------|--------------|
|    | 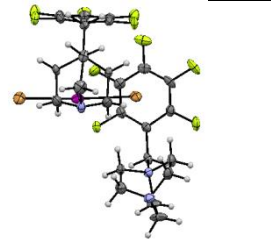 <p>c)</p>                                                                                                                                                             |                            |              |
| 42 |  <p>a) b)</p>                                                                                                                                                          | CCDC-745349 <sup>4</sup>   | Br75         |
| 43 |  <p>a) b)</p>                                                                                                                                                          | CCDC-745351 <sup>4</sup>   | Br74         |
| 44 |  <p>a) b)</p>                                                                                                                                                          | CCDC-1005284<br>Table S9   | Br73         |
| 45 |  <p>a) b)</p> <p>  <br/> <math>2 \text{ Br}^- + 3 \text{ MeOH}</math> </p>         | CCDC-752837 <sup>2</sup>   | Br70         |
| 46 |  <p>a) b)</p> <p>  <br/> <math>2 \text{ Br}^- + 2 \text{ H}_2\text{O}</math> </p> | See reference <sup>9</sup> | Br50         |
| 47 |  <p>a) b)</p> <p>  <br/> <math>2 \text{ Br}^-</math> </p>                         | CCDC-774614 <sup>10</sup>  | Br63<br>Br64 |
| 48 |  <p>a) b)</p>                                                                                                                                                        | CCDC-967089<br>Table S21   | Br51<br>Br52 |



|    |                                                                                                                                                                                                                    |                           |              |
|----|--------------------------------------------------------------------------------------------------------------------------------------------------------------------------------------------------------------------|---------------------------|--------------|
| 49 | 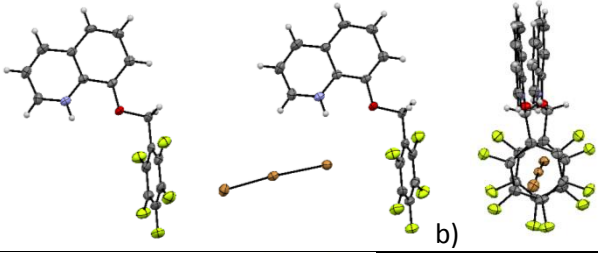 <p>a) b)</p>                                                                                                                     | CCDC-779161 <sup>10</sup> | Br66<br>Br67 |
| 50 |  <p>a) b)</p>                                                                                                                     | CCDC-868497 <sup>8</sup>  | Br55         |
| 51 |  <p>a) b)</p>                                                                                                                    | CCDC-1005285<br>Table S22 | Br53<br>Br54 |
| 52 |  <p>a) b)</p>                                                                                                                   | CCDC-967097<br>Table S23  | Br38         |
| 53 |  <p>a) b)</p>  <p>2 Br<sup>-</sup> + DMF</p> | CCDC-915604 <sup>11</sup> | Br28<br>Br29 |
| 54 |  <p>a) b)</p>                                                                                                                   | CCDC-1005286<br>Table S4  | Br48         |

|    |                                                                                                                                                                                               |                            |              |
|----|-----------------------------------------------------------------------------------------------------------------------------------------------------------------------------------------------|----------------------------|--------------|
|    | 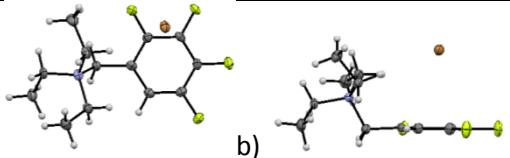 <p>a) b)</p>                                                                                                |                            | Br49         |
| 55 |  <p>a) b)</p>                                                                                                | CCDC-1005287<br>Table S14  | Br33         |
| 56 |  <p>a) b)</p>                                                                                                | See reference <sup>9</sup> | Br45<br>Br46 |
| 57 |  <p>a) b)</p> <p>  </p>  | See reference <sup>9</sup> | I79          |
| 58 |  <p>a) b)</p> <p>  </p> | See reference <sup>9</sup> | I85          |
| 59 |  <p>a) b)</p>                                                                                              | CCDC-1005288<br>Table S8   | I83          |

|    |                                                                                                                                                                                                |                           |            |
|----|------------------------------------------------------------------------------------------------------------------------------------------------------------------------------------------------|---------------------------|------------|
| 60 | 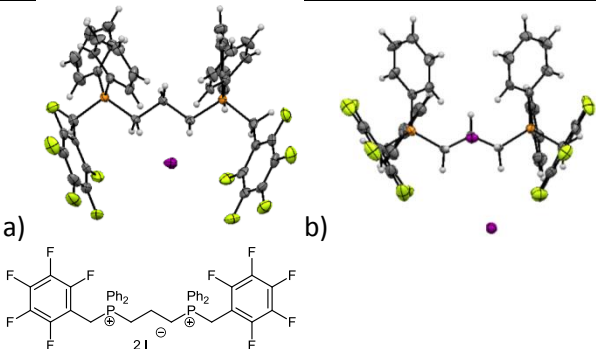 <p>a) b)</p> <p><chem>Fc1cc(F)c(F)c(F)c1C[P+](c1ccccc1)CC[P+](c1ccccc1)Cc2cc(F)c(F)c(F)c2.[I-]</chem> 21</p> | CCDC-774616 <sup>10</sup> | 180<br>181 |
| 61 |  <p>a) b)</p>                                                                                                 | CCDC-1005289<br>Table S26 | 186<br>187 |
| 62 |  <p>a) b)</p>                                                                                                 | CCDC-936266 <sup>7</sup>  | 189        |
| 63 |  <p>a) b)</p>                                                                                               | CCDC-915599 <sup>11</sup> | 188        |
| 64 |  <p>a) b)</p>                                                                                               | CCDC-752835 <sup>2</sup>  | 195        |
| 65 |  <p>a) b)</p>                                                                                               | CCDC-795077 <sup>12</sup> | 193        |
|    |  <p>a) b)</p>                                                                                               |                           | 194        |
| 66 |  <p>a) b)</p>                                                                                               | CCDC-936267 <sup>7</sup>  | 184        |

|    |                                                                                                                                                                                                                                                                                                                                                                                                                                                                                                                                                                          |                           |                   |
|----|--------------------------------------------------------------------------------------------------------------------------------------------------------------------------------------------------------------------------------------------------------------------------------------------------------------------------------------------------------------------------------------------------------------------------------------------------------------------------------------------------------------------------------------------------------------------------|---------------------------|-------------------|
|    | 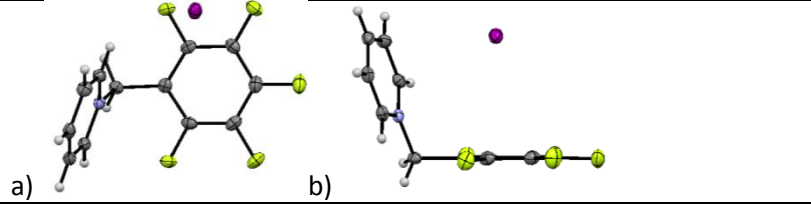 <p>a) b)</p>                                                                                                                                                                                                                                                                                                                                                                                                                                                                          |                           |                   |
| 67 |  <p>a) b)</p>                                                                                                                                                                                                                                                                                                                                                                                                                                                                          | CCDC-967130 <sup>13</sup> | I82               |
| 68 |  <p>a)</p> $\left[ \begin{array}{c} \text{F} \quad \text{F} \\   \quad   \\ \text{C}_6\text{H}_2 \\   \quad   \\ \text{F} \quad \text{F} \end{array} \text{P}^{\oplus}(\text{Ph})_2 \text{---} \text{CH}_2\text{---} \text{CH}_2\text{---} \text{CH}_2\text{---} \text{P}^{\oplus}(\text{Ph})_2 \begin{array}{c} \text{F} \quad \text{F} \\   \quad   \\ \text{C}_6\text{H}_2 \\   \quad   \\ \text{F} \quad \text{F} \end{array} \right]_2 \quad 21^{\ominus} \quad \text{I}_4^{2-}$ | CCDC-774617 <sup>10</sup> | I90<br>I91<br>I92 |
| 69 |  <p>a) b)</p>                                                                                                                                                                                                                                                                                                                                                                                                                                                                        | CCDC-868498 <sup>8</sup>  | Co101             |
| 70 |  <p>a) b)</p>                                                                                                                                                                                                                                                                                                                                                                                                                                                                        | CCDC-915601 <sup>11</sup> | Co103             |
| 71 |  <p>a) b)</p>                                                                                                                                                                                                                                                                                                                                                                                                                                                                        | CCDC-915600 <sup>11</sup> | Co102             |

|    |  |                           |              |
|----|--|---------------------------|--------------|
| 72 |  | CCDC-831302 <sup>14</sup> | Co108        |
|    |  |                           | Co109        |
| 73 |  | CCDC-831304 <sup>14</sup> | Co106        |
|    |  |                           | Co107        |
| 74 |  | CCDC-936268 <sup>7</sup>  | Co104        |
|    |  |                           | Co105        |
| 75 |  | CCDC-936269 <sup>7</sup>  | Co110        |
| 76 |  | CCDC-831303 <sup>14</sup> | Co96         |
| 77 |  | CCDC-752836 <sup>14</sup> | Co112        |
| 78 |  | CCDC-915605 <sup>11</sup> | Co97<br>Co98 |

|    |                                                                                   |                           |               |
|----|-----------------------------------------------------------------------------------|---------------------------|---------------|
| 79 | 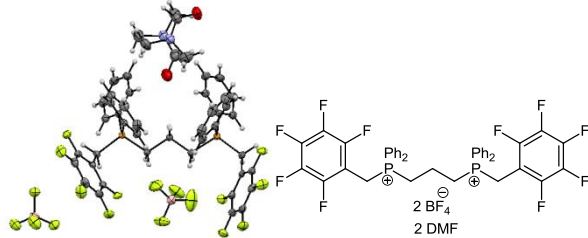 | CCDC-915606 <sup>11</sup> | Co99<br>Co100 |
| 80 |  | CCDC-795078 <sup>12</sup> | Co111         |

**Crystal data of the present paper:****Table S2. Crystal data and structure refinement for (1A).**

|                                   |                                                             |                                |
|-----------------------------------|-------------------------------------------------------------|--------------------------------|
| Empirical formula                 | C <sub>13</sub> H <sub>18</sub> BrF <sub>4</sub> N          |                                |
| Formula weight                    | 344.19                                                      |                                |
| Temperature                       | 123(2) K                                                    |                                |
| Wavelength                        | 0.71073 Å                                                   |                                |
| Crystal system                    | Monoclinic                                                  |                                |
| Space group                       | <i>P</i> 2 <sub>1</sub> / <i>c</i>                          |                                |
| Unit cell dimensions              | <i>a</i> = 12.9686(2) Å                                     | $\alpha = 90^\circ$ .          |
|                                   | <i>b</i> = 8.1122(2) Å                                      | $\beta = 110.7290(10)^\circ$ . |
|                                   | <i>c</i> = 14.4871(3) Å                                     | $\gamma = 90^\circ$ .          |
| Volume                            | 1425.44(5) Å <sup>3</sup>                                   |                                |
| <i>Z</i>                          | 4                                                           |                                |
| Density (calculated)              | 1.604 Mg/m <sup>3</sup>                                     |                                |
| Absorption coefficient            | 2.915 mm <sup>-1</sup>                                      |                                |
| F(000)                            | 696                                                         |                                |
| Crystal size                      | 0.30 x 0.22 x 0.20 mm <sup>3</sup>                          |                                |
| Theta range for data collection   | 3.01 to 25.25°.                                             |                                |
| Index ranges                      | -15 ≤ <i>h</i> ≤ 15, -9 ≤ <i>k</i> ≤ 9, -17 ≤ <i>l</i> ≤ 17 |                                |
| Reflections collected             | 4641                                                        |                                |
| Independent reflections           | 2573 [R(int) = 0.0161]                                      |                                |
| Completeness to theta = 25.25°    | 99.7 %                                                      |                                |
| Absorption correction             | Semi-empirical from equivalents                             |                                |
| Max. and min. transmission        | 0.5933 and 0.4751                                           |                                |
| Refinement method                 | Full-matrix least-squares on F <sup>2</sup>                 |                                |
| Data / restraints / parameters    | 2573 / 0 / 172                                              |                                |
| Goodness-of-fit on F <sup>2</sup> | 1.022                                                       |                                |
| Final R indices [I > 2σ(I)]       | R1 = 0.0242, wR2 = 0.0539                                   |                                |
| R indices (all data)              | R1 = 0.0322, wR2 = 0.0574                                   |                                |
| Largest diff. peak and hole       | 0.267 and -0.287 e.Å <sup>-3</sup>                          |                                |

**Table S3. Crystal data and structure refinement for (1B).**

|                                   |                                                                   |                    |
|-----------------------------------|-------------------------------------------------------------------|--------------------|
| Empirical formula                 | C <sub>16</sub> H <sub>25</sub> BrF <sub>4</sub> N <sub>2</sub> O |                    |
| Formula weight                    | 417.29                                                            |                    |
| Temperature                       | 123(2) K                                                          |                    |
| Wavelength                        | 0.71073 Å                                                         |                    |
| Crystal system                    | Monoclinic                                                        |                    |
| Space group                       | P2 <sub>1</sub>                                                   |                    |
| Unit cell dimensions              | a = 7.6426(2) Å                                                   | α = 90°.           |
|                                   | b = 11.6845(3) Å                                                  | β = 107.3460(10)°. |
|                                   | c = 10.7767(3) Å                                                  | γ = 90°.           |
| Volume                            | 918.59(4) Å <sup>3</sup>                                          |                    |
| Z                                 | 2                                                                 |                    |
| Density (calculated)              | 1.509 Mg/m <sup>3</sup>                                           |                    |
| Absorption coefficient            | 2.281 mm <sup>-1</sup>                                            |                    |
| F(000)                            | 428                                                               |                    |
| Crystal size                      | 0.30 x 0.20 x 0.08 mm <sup>3</sup>                                |                    |
| Theta range for data collection   | 2.64 to 25.00°.                                                   |                    |
| Index ranges                      | -9 ≤ h ≤ 7, -13 ≤ k ≤ 13, -12 ≤ l ≤ 12                            |                    |
| Reflections collected             | 11604                                                             |                    |
| Independent reflections           | 3178 [R(int) = 0.0473]                                            |                    |
| Completeness to theta = 25.00°    | 99.9 %                                                            |                    |
| Absorption correction             | Semi-empirical from equivalents                                   |                    |
| Max. and min. transmission        | 0.8386 and 0.5477                                                 |                    |
| Refinement method                 | Full-matrix least-squares on F <sup>2</sup>                       |                    |
| Data / restraints / parameters    | 3178 / 2 / 223                                                    |                    |
| Goodness-of-fit on F <sup>2</sup> | 1.071                                                             |                    |
| Final R indices [I > 2σ(I)]       | R1 = 0.0295, wR2 = 0.0620                                         |                    |
| R indices (all data)              | R1 = 0.0347, wR2 = 0.0640                                         |                    |
| Absolute structure parameter      | 0.063(8)                                                          |                    |
| Largest diff. peak and hole       | 0.229 and -0.267 e.Å <sup>-3</sup>                                |                    |

Restraints: floating origin, DFIX (s = 0.02)



**Table S4. Crystal data and structure refinement for (2).**

|                                   |                                                                    |                       |
|-----------------------------------|--------------------------------------------------------------------|-----------------------|
| Empirical formula                 | $C_{13}H_{18}BrF_4N$                                               |                       |
| Formula weight                    | 344.19                                                             |                       |
| Temperature                       | 123(2) K                                                           |                       |
| Wavelength                        | 0.71073 Å                                                          |                       |
| Crystal system                    | Orthorhombic                                                       |                       |
| Space group                       | $Pca2_1$                                                           |                       |
| Unit cell dimensions              | $a = 14.1641(2)$ Å                                                 | $\alpha = 90^\circ$ . |
|                                   | $b = 18.5407(3)$ Å                                                 | $\beta = 90^\circ$ .  |
|                                   | $c = 10.9050(2)$ Å                                                 | $\gamma = 90^\circ$ . |
| Volume                            | $2863.79(8)$ Å <sup>3</sup>                                        |                       |
| Z                                 | 8                                                                  |                       |
| Density (calculated)              | 1.597 Mg/m <sup>3</sup>                                            |                       |
| Absorption coefficient            | 2.901 mm <sup>-1</sup>                                             |                       |
| F(000)                            | 1392                                                               |                       |
| Crystal size                      | 0.20 x 0.18 x 0.04 mm <sup>3</sup>                                 |                       |
| Theta range for data collection   | 2.60 to 25.25°.                                                    |                       |
| Index ranges                      | $-14 \leq h \leq 17$ , $-22 \leq k \leq 22$ , $-13 \leq l \leq 13$ |                       |
| Reflections collected             | 35549                                                              |                       |
| Independent reflections           | 5158 [R(int) = 0.0545]                                             |                       |
| Completeness to theta = 25.25°    | 99.8 %                                                             |                       |
| Absorption correction             | Semi-empirical from equivalents                                    |                       |
| Max. and min. transmission        | 0.8928 and 0.5946                                                  |                       |
| Refinement method                 | Full-matrix least-squares on F <sup>2</sup>                        |                       |
| Data / restraints / parameters    | 5158 / 1 / 344                                                     |                       |
| Goodness-of-fit on F <sup>2</sup> | 1.021                                                              |                       |
| Final R indices [I > 2σ(I)]       | R1 = 0.0285, wR2 = 0.0583                                          |                       |
| R indices (all data)              | R1 = 0.0346, wR2 = 0.0608                                          |                       |
| Absolute structure parameter      | 0.090(7)                                                           |                       |
| Largest diff. peak and hole       | 0.547 and -0.273 e.Å <sup>-3</sup>                                 |                       |
| Restraint: floating origin        |                                                                    |                       |

**Table S5. Crystal data and structure refinement for (3).**

|                                   |                                                    |                    |
|-----------------------------------|----------------------------------------------------|--------------------|
| Empirical formula                 | C <sub>13</sub> H <sub>19</sub> BrF <sub>3</sub> N |                    |
| Formula weight                    | 326.20                                             |                    |
| Temperature                       | 123(2) K                                           |                    |
| Wavelength                        | 0.71073 Å                                          |                    |
| Crystal system                    | Monoclinic                                         |                    |
| Space group                       | <i>P</i> 2 <sub>1</sub> / <i>n</i>                 |                    |
| Unit cell dimensions              | a = 7.75180(10) Å                                  | α = 90°.           |
|                                   | b = 10.4214(2) Å                                   | β = 100.5560(10)°. |
|                                   | c = 17.7318(3) Å                                   | γ = 90°.           |
| Volume                            | 1408.21(4) Å <sup>3</sup>                          |                    |
| Z                                 | 4                                                  |                    |
| Density (calculated)              | 1.539 Mg/m <sup>3</sup>                            |                    |
| Absorption coefficient            | 2.936 mm <sup>-1</sup>                             |                    |
| F(000)                            | 664                                                |                    |
| Crystal size                      | 0.30 x 0.20 x 0.16 mm <sup>3</sup>                 |                    |
| Theta range for data collection   | 2.71 to 25.02°.                                    |                    |
| Index ranges                      | -9 ≤ h ≤ 9, -12 ≤ k ≤ 11, -20 ≤ l ≤ 21             |                    |
| Reflections collected             | 8157                                               |                    |
| Independent reflections           | 2495 [R(int) = 0.0229]                             |                    |
| Completeness to theta = 25.02°    | 99.9 %                                             |                    |
| Absorption correction             | Semi-empirical from equivalents                    |                    |
| Max. and min. transmission        | 0.6509 and 0.4729                                  |                    |
| Refinement method                 | Full-matrix least-squares on F <sup>2</sup>        |                    |
| Data / restraints / parameters    | 2495 / 0 / 163                                     |                    |
| Goodness-of-fit on F <sup>2</sup> | 1.036                                              |                    |
| Final R indices [I > 2σ(I)]       | R1 = 0.0216, wR2 = 0.0486                          |                    |
| R indices (all data)              | R1 = 0.0267, wR2 = 0.0501                          |                    |
| Largest diff. peak and hole       | 0.271 and -0.249 e.Å <sup>-3</sup>                 |                    |

**Table S6. Crystal data and structure refinement for (4).**

|                                   |                                                     |                   |
|-----------------------------------|-----------------------------------------------------|-------------------|
| Empirical formula                 | C <sub>13</sub> H <sub>21</sub> BrF <sub>3</sub> NO |                   |
| Formula weight                    | 344.22                                              |                   |
| Temperature                       | 123(2) K                                            |                   |
| Wavelength                        | 0.71073 Å                                           |                   |
| Crystal system                    | Monoclinic                                          |                   |
| Space group                       | P2 <sub>1</sub> /c                                  |                   |
| Unit cell dimensions              | a = 13.9329(3) Å                                    | α = 90°.          |
|                                   | b = 8.3923(2) Å                                     | β = 94.0190(10)°. |
|                                   | c = 12.8666(3) Å                                    | γ = 90°.          |
| Volume                            | 1500.78(6) Å <sup>3</sup>                           |                   |
| Z                                 | 4                                                   |                   |
| Density (calculated)              | 1.523 Mg/m <sup>3</sup>                             |                   |
| Absorption coefficient            | 2.764 mm <sup>-1</sup>                              |                   |
| F(000)                            | 704                                                 |                   |
| Crystal size                      | 0.30 x 0.20 x 0.10 mm <sup>3</sup>                  |                   |
| Theta range for data collection   | 2.93 to 25.25°.                                     |                   |
| Index ranges                      | -16 ≤ h ≤ 16, -8 ≤ k ≤ 10, -15 ≤ l ≤ 15             |                   |
| Reflections collected             | 8720                                                |                   |
| Independent reflections           | 2712 [R(int) = 0.0258]                              |                   |
| Completeness to theta = 25.25°    | 99.8 %                                              |                   |
| Absorption correction             | Semi-empirical from equivalents                     |                   |
| Max. and min. transmission        | 0.7696 and 0.4911                                   |                   |
| Refinement method                 | Full-matrix least-squares on F <sup>2</sup>         |                   |
| Data / restraints / parameters    | 2712 / 2 / 178                                      |                   |
| Goodness-of-fit on F <sup>2</sup> | 1.049                                               |                   |
| Final R indices [I > 2σ(I)]       | R1 = 0.0227, wR2 = 0.0524                           |                   |
| R indices (all data)              | R1 = 0.0292, wR2 = 0.0542                           |                   |
| Largest diff. peak and hole       | 0.313 and -0.244 e.Å <sup>-3</sup>                  |                   |
| Restraints: DFIX (s = 0.02)       |                                                     |                   |

**Table S7. Crystal data and structure refinement for (5).**

|                                   |                                                    |          |
|-----------------------------------|----------------------------------------------------|----------|
| Empirical formula                 | C <sub>13</sub> H <sub>20</sub> BrF <sub>2</sub> N |          |
| Formula weight                    | 308.21                                             |          |
| Temperature                       | 123(2) K                                           |          |
| Wavelength                        | 0.71073 Å                                          |          |
| Crystal system                    | Orthorhombic                                       |          |
| Space group                       | <i>Pna</i> 2 <sub>1</sub>                          |          |
| Unit cell dimensions              | a = 13.4970(2) Å                                   | α = 90°. |
|                                   | b = 13.2580(2) Å                                   | β = 90°. |
|                                   | c = 7.79800(10) Å                                  | γ = 90°. |
| Volume                            | 1395.40(3) Å <sup>3</sup>                          |          |
| Z                                 | 4                                                  |          |
| Density (calculated)              | 1.467 Mg/m <sup>3</sup>                            |          |
| Absorption coefficient            | 2.948 mm <sup>-1</sup>                             |          |
| F(000)                            | 632                                                |          |
| Crystal size                      | 0.33 x 0.21 x 0.19 mm <sup>3</sup>                 |          |
| Theta range for data collection   | 3.02 to 25.24°.                                    |          |
| Index ranges                      | -15 ≤ h ≤ 16, -15 ≤ k ≤ 14, -9 ≤ l ≤ 9             |          |
| Reflections collected             | 17465                                              |          |
| Independent reflections           | 2530 [R(int) = 0.0387]                             |          |
| Completeness to theta = 25.24°    | 99.9 %                                             |          |
| Absorption correction             | Semi-empirical from equivalents                    |          |
| Max. and min. transmission        | 0.6043 and 0.4429                                  |          |
| Refinement method                 | Full-matrix least-squares on F <sup>2</sup>        |          |
| Data / restraints / parameters    | 2530 / 1 / 154                                     |          |
| Goodness-of-fit on F <sup>2</sup> | 1.067                                              |          |
| Final R indices [I > 2σ(I)]       | R1 = 0.0217, wR2 = 0.0490                          |          |
| R indices (all data)              | R1 = 0.0242, wR2 = 0.0501                          |          |
| Absolute structure parameter      | 0.064(9)                                           |          |
| Largest diff. peak and hole       | 0.175 and -0.439 e.Å <sup>-3</sup>                 |          |
| Restraint: floating origin        |                                                    |          |

**Table S8. Crystal data and structure refinement for (6).**

|                                   |                                                                                                                                                                         |
|-----------------------------------|-------------------------------------------------------------------------------------------------------------------------------------------------------------------------|
| Empirical formula                 | C <sub>13</sub> H <sub>17</sub> F <sub>3</sub> IN                                                                                                                       |
| Formula weight                    | 409.18                                                                                                                                                                  |
| Temperature                       | 123(2) K                                                                                                                                                                |
| Wavelength                        | 0.71073 Å                                                                                                                                                               |
| Crystal system                    | Monoclinic                                                                                                                                                              |
| Space group                       | <i>P</i> 2 <sub>1</sub> / <i>n</i>                                                                                                                                      |
| Unit cell dimensions              | $a = 8.01450(10) \text{ \AA}$ $\alpha = 90^\circ$ .<br>$b = 13.8741(2) \text{ \AA}$ $\beta = 95.0150(10)^\circ$ .<br>$c = 13.5995(2) \text{ \AA}$ $\gamma = 90^\circ$ . |
| Volume                            | 1506.39(4) Å <sup>3</sup>                                                                                                                                               |
| Z                                 | 4                                                                                                                                                                       |
| Density (calculated)              | 1.804 Mg/m <sup>3</sup>                                                                                                                                                 |
| Absorption coefficient            | 2.169 mm <sup>-1</sup>                                                                                                                                                  |
| F(000)                            | 800                                                                                                                                                                     |
| Crystal size                      | 0.50 x 0.25 x 0.19 mm <sup>3</sup>                                                                                                                                      |
| Theta range for data collection   | 2.10 to 25.02°.                                                                                                                                                         |
| Index ranges                      | -9<= <i>h</i> <=8, -16<= <i>k</i> <=16, -16<= <i>l</i> <=16                                                                                                             |
| Reflections collected             | 8756                                                                                                                                                                    |
| Independent reflections           | 2656 [R(int) = 0.0194]                                                                                                                                                  |
| Completeness to theta = 25.02°    | 99.9 %                                                                                                                                                                  |
| Absorption correction             | Semi-empirical from equivalents                                                                                                                                         |
| Max. and min. transmission        | 0.6834 and 0.4102                                                                                                                                                       |
| Refinement method                 | Full-matrix least-squares on F <sup>2</sup>                                                                                                                             |
| Data / restraints / parameters    | 2656 / 0 / 181                                                                                                                                                          |
| Goodness-of-fit on F <sup>2</sup> | 1.038                                                                                                                                                                   |
| Final R indices [I>2σ(I)]         | R1 = 0.0189, wR2 = 0.0427                                                                                                                                               |
| R indices (all data)              | R1 = 0.0210, wR2 = 0.0435                                                                                                                                               |
| Largest diff. peak and hole       | 0.476 and -0.387 e.Å <sup>-3</sup>                                                                                                                                      |

**Table S9. Crystal data and structure refinement for (7).**

|                                   |                                                    |                 |
|-----------------------------------|----------------------------------------------------|-----------------|
| Empirical formula                 | C <sub>14</sub> H <sub>11</sub> BrF <sub>5</sub> N |                 |
| Formula weight                    | 368.15                                             |                 |
| Temperature                       | 123(2) K                                           |                 |
| Wavelength                        | 0.71073 Å                                          |                 |
| Crystal system                    | Monoclinic                                         |                 |
| Space group                       | P2 <sub>1</sub> /c                                 |                 |
| Unit cell dimensions              | a = 5.7503(2) Å                                    | α = 90°.        |
|                                   | b = 25.0706(9) Å                                   | β = 94.871(2)°. |
|                                   | c = 9.5048(4) Å                                    | γ = 90°.        |
| Volume                            | 1365.30(9) Å <sup>3</sup>                          |                 |
| Z                                 | 4                                                  |                 |
| Density (calculated)              | 1.791 Mg/m <sup>3</sup>                            |                 |
| Absorption coefficient            | 3.060 mm <sup>-1</sup>                             |                 |
| F(000)                            | 728                                                |                 |
| Crystal size                      | 0.22 x 0.14 x 0.12 mm <sup>3</sup>                 |                 |
| Theta range for data collection   | 2.70 to 25.02°.                                    |                 |
| Index ranges                      | -5 ≤ h ≤ 6, -29 ≤ k ≤ 29, -11 ≤ l ≤ 11             |                 |
| Reflections collected             | 14953                                              |                 |
| Independent reflections           | 2389 [R(int) = 0.0833]                             |                 |
| Completeness to theta = 25.02°    | 99.1 %                                             |                 |
| Absorption correction             | Semi-empirical from equivalents                    |                 |
| Max. and min. transmission        | 0.7103 and 0.5525                                  |                 |
| Refinement method                 | Full-matrix least-squares on F <sup>2</sup>        |                 |
| Data / restraints / parameters    | 2389 / 0 / 190                                     |                 |
| Goodness-of-fit on F <sup>2</sup> | 1.077                                              |                 |
| Final R indices [I > 2σ(I)]       | R1 = 0.0884, wR2 = 0.2410                          |                 |
| R indices (all data)              | R1 = 0.1119, wR2 = 0.2581                          |                 |
| Largest diff. peak and hole       | 4.386 and -0.835 e.Å <sup>-3</sup>                 |                 |

**Table S10. Crystal data and structure refinement for (8).**

|                                   |                                                                  |                               |
|-----------------------------------|------------------------------------------------------------------|-------------------------------|
| Empirical formula                 | $C_{16}H_{16}BrF_4N$                                             |                               |
| Formula weight                    | 378.21                                                           |                               |
| Temperature                       | 123(2) K                                                         |                               |
| Wavelength                        | 0.71073 Å                                                        |                               |
| Crystal system                    | Monoclinic                                                       |                               |
| Space group                       | $P2_1/n$                                                         |                               |
| Unit cell dimensions              | $a = 8.0793(2)$ Å                                                | $\alpha = 90^\circ$ .         |
|                                   | $b = 16.9865(3)$ Å                                               | $\beta = 93.1410(10)^\circ$ . |
|                                   | $c = 11.3472(2)$ Å                                               | $\gamma = 90^\circ$ .         |
| Volume                            | $1554.94(5)$ Å <sup>3</sup>                                      |                               |
| Z                                 | 4                                                                |                               |
| Density (calculated)              | 1.616 Mg/m <sup>3</sup>                                          |                               |
| Absorption coefficient            | 2.680 mm <sup>-1</sup>                                           |                               |
| F(000)                            | 760                                                              |                               |
| Crystal size                      | 0.40 x 0.19 x 0.06 mm <sup>3</sup>                               |                               |
| Theta range for data collection   | 2.40 to 25.02°.                                                  |                               |
| Index ranges                      | $-9 \leq h \leq 9$ , $-20 \leq k \leq 20$ , $-12 \leq l \leq 13$ |                               |
| Reflections collected             | 9119                                                             |                               |
| Independent reflections           | 2750 [R(int) = 0.0349]                                           |                               |
| Completeness to theta = 25.02°    | 99.9 %                                                           |                               |
| Absorption correction             | Semi-empirical from equivalents                                  |                               |
| Max. and min. transmission        | 0.8557 and 0.4136                                                |                               |
| Refinement method                 | Full-matrix least-squares on F <sup>2</sup>                      |                               |
| Data / restraints / parameters    | 2750 / 0 / 199                                                   |                               |
| Goodness-of-fit on F <sup>2</sup> | 1.101                                                            |                               |
| Final R indices [I > 2σ(I)]       | R1 = 0.0270, wR2 = 0.0601                                        |                               |
| R indices (all data)              | R1 = 0.0378, wR2 = 0.0625                                        |                               |
| Largest diff. peak and hole       | 0.280 and -0.306 e.Å <sup>-3</sup>                               |                               |

**Table S11. Crystal data and structure refinement for (9).**

|                                   |                                                    |          |
|-----------------------------------|----------------------------------------------------|----------|
| Empirical formula                 | C <sub>16</sub> H <sub>17</sub> BrF <sub>3</sub> N |          |
| Formula weight                    | 360.22                                             |          |
| Temperature                       | 123(2) K                                           |          |
| Wavelength                        | 0.71073 Å                                          |          |
| Crystal system                    | Orthorhombic                                       |          |
| Space group                       | Pna2 <sub>1</sub>                                  |          |
| Unit cell dimensions              | a = 11.7838(2) Å                                   | α = 90°. |
|                                   | b = 20.3034(4) Å                                   | β = 90°. |
|                                   | c = 6.37720(10) Å                                  | γ = 90°. |
| Volume                            | 1525.75(5) Å <sup>3</sup>                          |          |
| Z                                 | 4                                                  |          |
| Density (calculated)              | 1.568 Mg/m <sup>3</sup>                            |          |
| Absorption coefficient            | 2.718 mm <sup>-1</sup>                             |          |
| F(000)                            | 728                                                |          |
| Crystal size                      | 0.18 x 0.16 x 0.13 mm <sup>3</sup>                 |          |
| Theta range for data collection   | 2.65 to 25.25°.                                    |          |
| Index ranges                      | -13 ≤ h ≤ 14, -23 ≤ k ≤ 24, -7 ≤ l ≤ 6             |          |
| Reflections collected             | 18750                                              |          |
| Independent reflections           | 2693 [R(int) = 0.0466]                             |          |
| Completeness to theta = 25.25°    | 99.8 %                                             |          |
| Absorption correction             | Semi-empirical from equivalents                    |          |
| Max. and min. transmission        | 0.7189 and 0.6404                                  |          |
| Refinement method                 | Full-matrix least-squares on F <sup>2</sup>        |          |
| Data / restraints / parameters    | 2693 / 1 / 190                                     |          |
| Goodness-of-fit on F <sup>2</sup> | 1.056                                              |          |
| Final R indices [I > 2σ(I)]       | R1 = 0.0235, wR2 = 0.0491                          |          |
| R indices (all data)              | R1 = 0.0274, wR2 = 0.0505                          |          |
| Absolute structure parameter      | 0.085(8)                                           |          |
| Largest diff. peak and hole       | 0.198 and -0.192 e.Å <sup>-3</sup>                 |          |

*Restraint: floating origin*



**Table S12. Crystal data and structure refinement for (10).**

|                                   |                                                                                 |                   |
|-----------------------------------|---------------------------------------------------------------------------------|-------------------|
| Empirical formula                 | C <sub>26</sub> H <sub>34</sub> Cl <sub>2</sub> F <sub>6</sub> N <sub>4</sub> O |                   |
| Formula weight                    | 603.47                                                                          |                   |
| Temperature                       | 123(2) K                                                                        |                   |
| Wavelength                        | 0.71073 Å                                                                       |                   |
| Crystal system                    | Monoclinic                                                                      |                   |
| Space group                       | C2/c                                                                            |                   |
| Unit cell dimensions              | a = 10.5705(2) Å                                                                | α = 90°.          |
|                                   | b = 9.9886(3) Å                                                                 | β = 95.7420(10)°. |
|                                   | c = 26.3808(5) Å                                                                | γ = 90°.          |
| Volume                            | 2771.43(11) Å <sup>3</sup>                                                      |                   |
| Z                                 | 4                                                                               |                   |
| Density (calculated)              | 1.446 Mg/m <sup>3</sup>                                                         |                   |
| Absorption coefficient            | 0.303 mm <sup>-1</sup>                                                          |                   |
| F(000)                            | 1256                                                                            |                   |
| Crystal size                      | 0.35 x 0.20 x 0.10 mm <sup>3</sup>                                              |                   |
| Theta range for data collection   | 2.81 to 25.02°.                                                                 |                   |
| Index ranges                      | -12 ≤ h ≤ 12, -11 ≤ k ≤ 11, -31 ≤ l ≤ 31                                        |                   |
| Reflections collected             | 4647                                                                            |                   |
| Independent reflections           | 2450 [R(int) = 0.0262]                                                          |                   |
| Completeness to theta = 25.02°    | 100.0 %                                                                         |                   |
| Absorption correction             | None                                                                            |                   |
| Refinement method                 | Full-matrix least-squares on F <sup>2</sup>                                     |                   |
| Data / restraints / parameters    | 2450 / 1 / 180                                                                  |                   |
| Goodness-of-fit on F <sup>2</sup> | 1.049                                                                           |                   |
| Final R indices [I > 2σ(I)]       | R1 = 0.0359, wR2 = 0.0811                                                       |                   |
| R indices (all data)              | R1 = 0.0439, wR2 = 0.0849                                                       |                   |
| Largest diff. peak and hole       | 0.233 and -0.203 e.Å <sup>-3</sup>                                              |                   |

Restraint: DFIX (s = 0.02)

**Table S13. Crystal data and structure refinement for (11).**

|                                   |                                                                   |                        |
|-----------------------------------|-------------------------------------------------------------------|------------------------|
| Empirical formula                 | $C_{12}H_8BrF_5N_2$                                               |                        |
| Formula weight                    | 355.11                                                            |                        |
| Temperature                       | 123(2) K                                                          |                        |
| Wavelength                        | 0.71073 Å                                                         |                        |
| Crystal system                    | Trigonal                                                          |                        |
| Space group                       | $P3_1$                                                            |                        |
| Unit cell dimensions              | $a = 8.72990(10)$ Å                                               | $\alpha = 90^\circ$ .  |
|                                   | $b = 8.72990(10)$ Å                                               | $\beta = 90^\circ$ .   |
|                                   | $c = 14.3094(3)$ Å                                                | $\gamma = 120^\circ$ . |
| Volume                            | $944.43(3)$ Å <sup>3</sup>                                        |                        |
| Z                                 | 3                                                                 |                        |
| Density (calculated)              | 1.873 Mg/m <sup>3</sup>                                           |                        |
| Absorption coefficient            | 3.316 mm <sup>-1</sup>                                            |                        |
| F(000)                            | 522                                                               |                        |
| Crystal size                      | 0.50 x 0.48 x 0.42 mm <sup>3</sup>                                |                        |
| Theta range for data collection   | 3.92 to 25.21°.                                                   |                        |
| Index ranges                      | $-10 \leq h \leq 10$ , $-10 \leq k \leq 9$ , $-16 \leq l \leq 17$ |                        |
| Reflections collected             | 5427                                                              |                        |
| Independent reflections           | 2170 [R(int) = 0.0200]                                            |                        |
| Completeness to theta = 25.21°    | 99.6 %                                                            |                        |
| Absorption correction             | Semi-empirical from equivalents                                   |                        |
| Max. and min. transmission        | 0.3364 and 0.2879                                                 |                        |
| Refinement method                 | Full-matrix least-squares on F <sup>2</sup>                       |                        |
| Data / restraints / parameters    | 2170 / 3 / 187                                                    |                        |
| Goodness-of-fit on F <sup>2</sup> | 1.087                                                             |                        |
| Final R indices [I > 2σ(I)]       | R1 = 0.0189, wR2 = 0.0381                                         |                        |
| R indices (all data)              | R1 = 0.0199, wR2 = 0.0384                                         |                        |
| Absolute structure parameter      | 0.035(6)                                                          |                        |
| Largest diff. peak and hole       | 0.197 and -0.319 e.Å <sup>-3</sup>                                |                        |

*Restraints: floating origin, DFIX (s = 0.02)*

**Table S14. Crystal data and structure refinement for (12).**

|                                   |                                                                |                   |
|-----------------------------------|----------------------------------------------------------------|-------------------|
| Empirical formula                 | C <sub>12</sub> H <sub>8</sub> BrF <sub>5</sub> N <sub>2</sub> |                   |
| Formula weight                    | 355.11                                                         |                   |
| Temperature                       | 123(2) K                                                       |                   |
| Wavelength                        | 0.71073 Å                                                      |                   |
| Crystal system                    | Monoclinic                                                     |                   |
| Space group                       | P2 <sub>1</sub> /n                                             |                   |
| Unit cell dimensions              | a = 11.4302(2) Å                                               | α = 90°.          |
|                                   | b = 9.47480(10) Å                                              | β = 98.8540(10)°. |
|                                   | c = 23.7921(5) Å                                               | γ = 90°.          |
| Volume                            | 2545.95(7) Å <sup>3</sup>                                      |                   |
| Z                                 | 8                                                              |                   |
| Density (calculated)              | 1.853 Mg/m <sup>3</sup>                                        |                   |
| Absorption coefficient            | 3.280 mm <sup>-1</sup>                                         |                   |
| F(000)                            | 1392                                                           |                   |
| Crystal size                      | 0.52 x 0.09 x 0.07 mm <sup>3</sup>                             |                   |
| Theta range for data collection   | 2.76 to 25.25°.                                                |                   |
| Index ranges                      | -13 ≤ h ≤ 13, -11 ≤ k ≤ 11, -28 ≤ l ≤ 28                       |                   |
| Reflections collected             | 8878                                                           |                   |
| Independent reflections           | 4612 [R(int) = 0.0241]                                         |                   |
| Completeness to theta = 25.25°    | 99.8 %                                                         |                   |
| Absorption correction             | Semi-empirical from equivalents                                |                   |
| Max. and min. transmission        | 0.8029 and 0.2803                                              |                   |
| Refinement method                 | Full-matrix least-squares on F <sup>2</sup>                    |                   |
| Data / restraints / parameters    | 4612 / 4 / 373                                                 |                   |
| Goodness-of-fit on F <sup>2</sup> | 1.034                                                          |                   |
| Final R indices [I > 2σ(I)]       | R1 = 0.0271, wR2 = 0.0550                                      |                   |
| R indices (all data)              | R1 = 0.0386, wR2 = 0.0587                                      |                   |
| Largest diff. peak and hole       | 0.278 and -0.281 e.Å <sup>-3</sup>                             |                   |

Restraints: DFIX (s = 0.02)

**Table S15. Crystal data and structure refinement for (13).**

|                                   |                                                                   |                 |
|-----------------------------------|-------------------------------------------------------------------|-----------------|
| Empirical formula                 | C <sub>17</sub> H <sub>12</sub> BrF <sub>5</sub> N <sub>2</sub> O |                 |
| Formula weight                    | 435.20                                                            |                 |
| Temperature                       | 123(2) K                                                          |                 |
| Wavelength                        | 0.71073 Å                                                         |                 |
| Crystal system                    | Triclinic                                                         |                 |
| Space group                       | P-1                                                               |                 |
| Unit cell dimensions              | a = 13.6652(3) Å                                                  | α = 77.611(2)°. |
|                                   | b = 14.6348(3) Å                                                  | β = 73.769(2)°. |
|                                   | c = 18.0643(3) Å                                                  | γ = 75.674(2)°. |
| Volume                            | 3319.49(11) Å <sup>3</sup>                                        |                 |
| Z                                 | 8                                                                 |                 |
| Density (calculated)              | 1.742 Mg/m <sup>3</sup>                                           |                 |
| Absorption coefficient            | 2.538 mm <sup>-1</sup>                                            |                 |
| F(000)                            | 1728                                                              |                 |
| Crystal size                      | 0.15 x 0.13 x 0.10 mm <sup>3</sup>                                |                 |
| Theta range for data collection   | 2.52 to 25.25°.                                                   |                 |
| Index ranges                      | -16<=h<=15, -17<=k<=17, -21<=l<=21                                |                 |
| Reflections collected             | 20164                                                             |                 |
| Independent reflections           | 12016 [R(int) = 0.0347]                                           |                 |
| Completeness to theta = 25.25°    | 99.8 %                                                            |                 |
| Absorption correction             | Semi-empirical from equivalents                                   |                 |
| Max. and min. transmission        | 0.7854 and 0.7020                                                 |                 |
| Refinement method                 | Full-matrix least-squares on F <sup>2</sup>                       |                 |
| Data / restraints / parameters    | 12016 / 12 / 961                                                  |                 |
| Goodness-of-fit on F <sup>2</sup> | 1.039                                                             |                 |
| Final R indices [I>2σ(I)]         | R1 = 0.0433, wR2 = 0.0806                                         |                 |
| R indices (all data)              | R1 = 0.0734, wR2 = 0.0909                                         |                 |
| Largest diff. peak and hole       | 0.503 and -0.484 e.Å <sup>-3</sup>                                |                 |

*Restraints: DFIX (s = 0.02)*

**Table S16. Crystal data and structure refinement for (14).**

|                                   |                                                                    |                                |
|-----------------------------------|--------------------------------------------------------------------|--------------------------------|
| Empirical formula                 | $C_{11}H_8BrF_5N_2$                                                |                                |
| Formula weight                    | 343.10                                                             |                                |
| Temperature                       | 123(2) K                                                           |                                |
| Wavelength                        | 0.71073 Å                                                          |                                |
| Crystal system                    | Monoclinic                                                         |                                |
| Space group                       | $P2_1/n$                                                           |                                |
| Unit cell dimensions              | $a = 10.1966(2)$ Å                                                 | $\alpha = 90^\circ$ .          |
|                                   | $b = 11.8976(2)$ Å                                                 | $\beta = 101.2530(10)^\circ$ . |
|                                   | $c = 10.2358(2)$ Å                                                 | $\gamma = 90^\circ$ .          |
| Volume                            | $1217.88(4)$ Å <sup>3</sup>                                        |                                |
| Z                                 | 4                                                                  |                                |
| Density (calculated)              | 1.871 Mg/m <sup>3</sup>                                            |                                |
| Absorption coefficient            | 3.425 mm <sup>-1</sup>                                             |                                |
| F(000)                            | 672                                                                |                                |
| Crystal size                      | 0.30 x 0.25 x 0.23 mm <sup>3</sup>                                 |                                |
| Theta range for data collection   | 3.42 to 25.02°.                                                    |                                |
| Index ranges                      | $-12 \leq h \leq 12$ , $-14 \leq k \leq 13$ , $-12 \leq l \leq 12$ |                                |
| Reflections collected             | 7035                                                               |                                |
| Independent reflections           | 2137 [R(int) = 0.0232]                                             |                                |
| Completeness to theta = 25.02°    | 99.6 %                                                             |                                |
| Absorption correction             | Semi-empirical from equivalents                                    |                                |
| Max. and min. transmission        | 0.5063 and 0.4264                                                  |                                |
| Refinement method                 | Full-matrix least-squares on F <sup>2</sup>                        |                                |
| Data / restraints / parameters    | 2137 / 0 / 173                                                     |                                |
| Goodness-of-fit on F <sup>2</sup> | 1.057                                                              |                                |
| Final R indices [I > 2σ(I)]       | R1 = 0.0217, wR2 = 0.0517                                          |                                |
| R indices (all data)              | R1 = 0.0261, wR2 = 0.0530                                          |                                |
| Largest diff. peak and hole       | 0.251 and -0.254 e.Å <sup>-3</sup>                                 |                                |

**Table S17. Crystal data and structure refinement for (15).**

|                                   |                                                                    |                   |
|-----------------------------------|--------------------------------------------------------------------|-------------------|
| Empirical formula                 | C <sub>21</sub> H <sub>11</sub> BrF <sub>10</sub> N <sub>2</sub> O |                   |
| Formula weight                    | 577.23                                                             |                   |
| Temperature                       | 123(2) K                                                           |                   |
| Wavelength                        | 0.71073 Å                                                          |                   |
| Crystal system                    | Monoclinic                                                         |                   |
| Space group                       | P2 <sub>1</sub> /c                                                 |                   |
| Unit cell dimensions              | a = 12.4829(3) Å                                                   | α = 90°.          |
|                                   | b = 16.1450(4) Å                                                   | β = 91.5290(10)°. |
|                                   | c = 10.3729(2) Å                                                   | γ = 90°.          |
| Volume                            | 2089.77(8) Å <sup>3</sup>                                          |                   |
| Z                                 | 4                                                                  |                   |
| Density (calculated)              | 1.835 Mg/m <sup>3</sup>                                            |                   |
| Absorption coefficient            | 2.074 mm <sup>-1</sup>                                             |                   |
| F(000)                            | 1136                                                               |                   |
| Crystal size                      | 0.25 x 0.18 x 0.14 mm <sup>3</sup>                                 |                   |
| Theta range for data collection   | 2.33 to 25.02°.                                                    |                   |
| Index ranges                      | -13<=h<=14, -18<=k<=19, -12<=l<=12                                 |                   |
| Reflections collected             | 26660                                                              |                   |
| Independent reflections           | 3690 [R(int) = 0.0623]                                             |                   |
| Completeness to theta = 25.02°    | 99.9 %                                                             |                   |
| Absorption correction             | Semi-empirical from equivalents                                    |                   |
| Max. and min. transmission        | 0.7600 and 0.6251                                                  |                   |
| Refinement method                 | Full-matrix least-squares on F <sup>2</sup>                        |                   |
| Data / restraints / parameters    | 3690 / 2 / 328                                                     |                   |
| Goodness-of-fit on F <sup>2</sup> | 1.060                                                              |                   |
| Final R indices [I>2σ(I)]         | R1 = 0.0614, wR2 = 0.1701                                          |                   |
| R indices (all data)              | R1 = 0.0778, wR2 = 0.1818                                          |                   |
| Largest diff. peak and hole       | 0.691 and -0.954 e.Å <sup>-3</sup>                                 |                   |

Restraints: DFIX (s = 0.02)

**Table S18. Crystal data and structure refinement for (16A).**

|                                   |                                                              |                             |
|-----------------------------------|--------------------------------------------------------------|-----------------------------|
| Empirical formula                 | $C_{13}H_{16}BrF_5N_2$                                       |                             |
| Formula weight                    | 375.19                                                       |                             |
| Temperature                       | 123(2) K                                                     |                             |
| Wavelength                        | 0.71073 Å                                                    |                             |
| Crystal system                    | Monoclinic                                                   |                             |
| Space group                       | $P2_1/n$                                                     |                             |
| Unit cell dimensions              | $a = 8.9614(3)$ Å                                            | $\alpha = 90^\circ$ .       |
|                                   | $b = 18.5641(7)$ Å                                           | $\beta = 94.771(2)^\circ$ . |
|                                   | $c = 8.8560(3)$ Å                                            | $\gamma = 90^\circ$ .       |
| Volume                            | $1468.18(9)$ Å <sup>3</sup>                                  |                             |
| Z                                 | 4                                                            |                             |
| Density (calculated)              | 1.697 Mg/m <sup>3</sup>                                      |                             |
| Absorption coefficient            | 2.849 mm <sup>-1</sup>                                       |                             |
| F(000)                            | 752                                                          |                             |
| Crystal size                      | 0.12 x 0.07 x 0.04 mm <sup>3</sup>                           |                             |
| Theta range for data collection   | 2.53 to 25.25°.                                              |                             |
| Index ranges                      | $-10 \leq h \leq 10, -22 \leq k \leq 22, -10 \leq l \leq 10$ |                             |
| Reflections collected             | 5195                                                         |                             |
| Independent reflections           | 2653 [R(int) = 0.0323]                                       |                             |
| Completeness to theta = 25.25°    | 99.7 %                                                       |                             |
| Absorption correction             | Semi-empirical from equivalents                              |                             |
| Max. and min. transmission        | 0.8946 and 0.7262                                            |                             |
| Refinement method                 | Full-matrix least-squares on F <sup>2</sup>                  |                             |
| Data / restraints / parameters    | 2653 / 0 / 190                                               |                             |
| Goodness-of-fit on F <sup>2</sup> | 1.192                                                        |                             |
| Final R indices [I > 2σ(I)]       | R1 = 0.0583, wR2 = 0.1277                                    |                             |
| R indices (all data)              | R1 = 0.0838, wR2 = 0.1357                                    |                             |
| Largest diff. peak and hole       | 0.684 and -0.385 e.Å <sup>-3</sup>                           |                             |

**Table S19. Crystal data and structure refinement for (16B).**

|                                   |                                                              |                             |
|-----------------------------------|--------------------------------------------------------------|-----------------------------|
| Empirical formula                 | $C_{13}H_{16}BrF_5N_2$                                       |                             |
| Formula weight                    | 375.19                                                       |                             |
| Temperature                       | 123(2) K                                                     |                             |
| Wavelength                        | 0.71073 Å                                                    |                             |
| Crystal system                    | Monoclinic                                                   |                             |
| Space group                       | $P2_1/n$                                                     |                             |
| Unit cell dimensions              | $a = 8.8555(2)$ Å                                            | $\alpha = 90^\circ$ .       |
|                                   | $b = 18.5382(5)$ Å                                           | $\beta = 94.773(2)^\circ$ . |
|                                   | $c = 8.9536(2)$ Å                                            | $\gamma = 90^\circ$ .       |
| Volume                            | $1464.77(6)$ Å <sup>3</sup>                                  |                             |
| Z                                 | 4                                                            |                             |
| Density (calculated)              | 1.701 Mg/m <sup>3</sup>                                      |                             |
| Absorption coefficient            | 2.855 mm <sup>-1</sup>                                       |                             |
| F(000)                            | 752                                                          |                             |
| Crystal size                      | 0.34 x 0.07 x 0.05 mm <sup>3</sup>                           |                             |
| Theta range for data collection   | 2.53 to 25.02°.                                              |                             |
| Index ranges                      | $-10 \leq h \leq 10, -22 \leq k \leq 22, -10 \leq l \leq 10$ |                             |
| Reflections collected             | 8527                                                         |                             |
| Independent reflections           | 2579 [R(int) = 0.0348]                                       |                             |
| Completeness to theta = 25.02°    | 99.4 %                                                       |                             |
| Absorption correction             | Semi-empirical from equivalents                              |                             |
| Max. and min. transmission        | 0.8704 and 0.4435                                            |                             |
| Refinement method                 | Full-matrix least-squares on F <sup>2</sup>                  |                             |
| Data / restraints / parameters    | 2579 / 0 / 190                                               |                             |
| Goodness-of-fit on F <sup>2</sup> | 1.242                                                        |                             |
| Final R indices [I > 2σ(I)]       | R1 = 0.0504, wR2 = 0.1145                                    |                             |
| R indices (all data)              | R1 = 0.0637, wR2 = 0.1181                                    |                             |
| Largest diff. peak and hole       | 0.403 and -0.387 e.Å <sup>-3</sup>                           |                             |



**Table S20. Crystal data and structure refinement for (17).**

|                                   |                                                     |                   |
|-----------------------------------|-----------------------------------------------------|-------------------|
| Empirical formula                 | C <sub>11</sub> H <sub>13</sub> BrF <sub>5</sub> NO |                   |
| Formula weight                    | 350.13                                              |                   |
| Temperature                       | 123(2) K                                            |                   |
| Wavelength                        | 0.71073 Å                                           |                   |
| Crystal system                    | Monoclinic                                          |                   |
| Space group                       | <i>P2<sub>1</sub>/n</i>                             |                   |
| Unit cell dimensions              | a = 6.86600(10) Å                                   | α = 90°.          |
|                                   | b = 14.2952(3) Å                                    | β = 94.4170(10)°. |
|                                   | c = 26.3661(5) Å                                    | γ = 90°.          |
| Volume                            | 2580.17(8) Å <sup>3</sup>                           |                   |
| Z                                 | 8                                                   |                   |
| Density (calculated)              | 1.803 Mg/m <sup>3</sup>                             |                   |
| Absorption coefficient            | 3.238 mm <sup>-1</sup>                              |                   |
| F(000)                            | 1392                                                |                   |
| Crystal size                      | 0.38 x 0.30 x 0.24 mm <sup>3</sup>                  |                   |
| Theta range for data collection   | 1.55 to 25.25°.                                     |                   |
| Index ranges                      | -8 ≤ h ≤ 8, -17 ≤ k ≤ 17, -31 ≤ l ≤ 31              |                   |
| Reflections collected             | 9105                                                |                   |
| Independent reflections           | 4666 [R(int) = 0.0175]                              |                   |
| Completeness to theta = 25.25°    | 100.0 %                                             |                   |
| Absorption correction             | Semi-empirical from equivalents                     |                   |
| Max. and min. transmission        | 0.5104 and 0.3725                                   |                   |
| Refinement method                 | Full-matrix least-squares on F <sup>2</sup>         |                   |
| Data / restraints / parameters    | 4666 / 2 / 367                                      |                   |
| Goodness-of-fit on F <sup>2</sup> | 1.031                                               |                   |
| Final R indices [I > 2σ(I)]       | R1 = 0.0245, wR2 = 0.0540                           |                   |
| R indices (all data)              | R1 = 0.0311, wR2 = 0.0568                           |                   |
| Largest diff. peak and hole       | 0.238 and -0.341 e.Å <sup>-3</sup>                  |                   |

Restraints: DFIX (s = 0.02)

**Table S21. Crystal data and structure refinement for (18A).**

|                                   |                                                                       |                    |
|-----------------------------------|-----------------------------------------------------------------------|--------------------|
| Empirical formula                 | C <sub>22</sub> H <sub>26</sub> BrClF <sub>10</sub> N <sub>2</sub> OS |                    |
| Formula weight                    | 671.87                                                                |                    |
| Temperature                       | 123(2) K                                                              |                    |
| Wavelength                        | 0.71073 Å                                                             |                    |
| Crystal system                    | Triclinic                                                             |                    |
| Space group                       | P-1                                                                   |                    |
| Unit cell dimensions              | a = 6.9241(2) Å                                                       | α = 111.6180(10)°. |
|                                   | b = 12.7624(3) Å                                                      | β = 90.966(2)°.    |
|                                   | c = 16.7270(4) Å                                                      | γ = 93.449(2)°.    |
| Volume                            | 1370.46(6) Å <sup>3</sup>                                             |                    |
| Z                                 | 2                                                                     |                    |
| Density (calculated)              | 1.628 Mg/m <sup>3</sup>                                               |                    |
| Absorption coefficient            | 1.761 mm <sup>-1</sup>                                                |                    |
| F(000)                            | 676                                                                   |                    |
| Crystal size                      | 0.44 x 0.40 x 0.27 mm <sup>3</sup>                                    |                    |
| Theta range for data collection   | 2.62 to 25.25°.                                                       |                    |
| Index ranges                      | -8<=h<=8, -15<=k<=15, -20<=l<=17                                      |                    |
| Reflections collected             | 8300                                                                  |                    |
| Independent reflections           | 4939 [R(int) = 0.0181]                                                |                    |
| Completeness to theta = 25.25°    | 99.6 %                                                                |                    |
| Absorption correction             | Semi-empirical from equivalents                                       |                    |
| Max. and min. transmission        | 0.6478 and 0.5113                                                     |                    |
| Refinement method                 | Full-matrix least-squares on F <sup>2</sup>                           |                    |
| Data / restraints / parameters    | 4939 / 37 / 343                                                       |                    |
| Goodness-of-fit on F <sup>2</sup> | 1.037                                                                 |                    |
| Final R indices [I>2sigma(I)]     | R1 = 0.0347, wR2 = 0.0851                                             |                    |
| R indices (all data)              | R1 = 0.0436, wR2 = 0.0897                                             |                    |
| Largest diff. peak and hole       | 0.403 and -0.602 e.Å <sup>-3</sup>                                    |                    |

Restraints: SIMU (36, s = 0.01), DELU (1, s = 0.01); EXYZ and EADP constraints utilized in halide disorder

**Table S22. Crystal data and structure refinement for (18B).**

|                                   |                                                                                  |                   |
|-----------------------------------|----------------------------------------------------------------------------------|-------------------|
| Empirical formula                 | C <sub>21</sub> H <sub>24</sub> Br <sub>2</sub> F <sub>10</sub> N <sub>2</sub> O |                   |
| Formula weight                    | 670.24                                                                           |                   |
| Temperature                       | 123(2) K                                                                         |                   |
| Wavelength                        | 0.71073 Å                                                                        |                   |
| Crystal system                    | Monoclinic                                                                       |                   |
| Space group                       | P2 <sub>1</sub> /c                                                               |                   |
| Unit cell dimensions              | a = 13.2107(3) Å                                                                 | α = 90°.          |
|                                   | b = 7.19550(10) Å                                                                | β = 91.1490(10)°. |
|                                   | c = 25.9512(6) Å                                                                 | γ = 90°.          |
| Volume                            | 2466.36(9) Å <sup>3</sup>                                                        |                   |
| Z                                 | 4                                                                                |                   |
| Density (calculated)              | 1.805 Mg/m <sup>3</sup>                                                          |                   |
| Absorption coefficient            | 3.380 mm <sup>-1</sup>                                                           |                   |
| F(000)                            | 1328                                                                             |                   |
| Crystal size                      | 0.22 x 0.18 x 0.04 mm <sup>3</sup>                                               |                   |
| Theta range for data collection   | 1.57 to 25.25°.                                                                  |                   |
| Index ranges                      | -15 ≤ h ≤ 15, -8 ≤ k ≤ 8, -31 ≤ l ≤ 31                                           |                   |
| Reflections collected             | 15646                                                                            |                   |
| Independent reflections           | 4457 [R(int) = 0.0523]                                                           |                   |
| Completeness to theta = 25.25°    | 99.9 %                                                                           |                   |
| Absorption correction             | Semi-empirical from equivalents                                                  |                   |
| Max. and min. transmission        | 0.8766 and 0.5234                                                                |                   |
| Refinement method                 | Full-matrix least-squares on F <sup>2</sup>                                      |                   |
| Data / restraints / parameters    | 4457 / 1 / 328                                                                   |                   |
| Goodness-of-fit on F <sup>2</sup> | 1.059                                                                            |                   |
| Final R indices [I > 2σ(I)]       | R1 = 0.0336, wR2 = 0.0608                                                        |                   |
| R indices (all data)              | R1 = 0.0498, wR2 = 0.0650                                                        |                   |
| Largest diff. peak and hole       | 0.354 and -0.363 e.Å <sup>-3</sup>                                               |                   |
| Restraint: DFIX (s = 0.02)        |                                                                                  |                   |

**Table S23. Crystal data and structure refinement for (18C).**

|                                   |                                                                                   |                    |
|-----------------------------------|-----------------------------------------------------------------------------------|--------------------|
| Empirical formula                 | C <sub>22</sub> H <sub>26</sub> Br <sub>2</sub> F <sub>10</sub> N <sub>2</sub> OS |                    |
| Formula weight                    | 716.33                                                                            |                    |
| Temperature                       | 123(2) K                                                                          |                    |
| Wavelength                        | 0.71073 Å                                                                         |                    |
| Crystal system                    | Triclinic                                                                         |                    |
| Space group                       | P-1                                                                               |                    |
| Unit cell dimensions              | a = 7.1359(2) Å                                                                   | α = 111.3640(10)°. |
|                                   | b = 12.6440(3) Å                                                                  | β = 91.7140(10)°.  |
|                                   | c = 16.7753(4) Å                                                                  | γ = 92.9300(10)°.  |
| Volume                            | 1405.81(6) Å <sup>3</sup>                                                         |                    |
| Z                                 | 2                                                                                 |                    |
| Density (calculated)              | 1.692 Mg/m <sup>3</sup>                                                           |                    |
| Absorption coefficient            | 3.043 mm <sup>-1</sup>                                                            |                    |
| F(000)                            | 712                                                                               |                    |
| Crystal size                      | 0.20 x 0.18 x 0.13 mm <sup>3</sup>                                                |                    |
| Theta range for data collection   | 2.86 to 25.25°.                                                                   |                    |
| Index ranges                      | -8<=h<=8, -13<=k<=15, -20<=l<=19                                                  |                    |
| Reflections collected             | 8524                                                                              |                    |
| Independent reflections           | 5077 [R(int) = 0.0190]                                                            |                    |
| Completeness to theta = 25.25°    | 99.6 %                                                                            |                    |
| Absorption correction             | Semi-empirical from equivalents                                                   |                    |
| Max. and min. transmission        | 0.6931 and 0.5813                                                                 |                    |
| Refinement method                 | Full-matrix least-squares on F <sup>2</sup>                                       |                    |
| Data / restraints / parameters    | 5077 / 30 / 343                                                                   |                    |
| Goodness-of-fit on F <sup>2</sup> | 1.055                                                                             |                    |
| Final R indices [I>2sigma(I)]     | R1 = 0.0530, wR2 = 0.1467                                                         |                    |
| R indices (all data)              | R1 = 0.0641, wR2 = 0.1551                                                         |                    |
| Largest diff. peak and hole       | 1.924 and -1.087 e.Å <sup>-3</sup>                                                |                    |

Restraints: SADI (6, s = 0,02), ISOR (24, s = 0.02); EADP constraint utilized in solvent disorder

**Table S24. Crystal data and structure refinement for (19).**

|                                   |                                                  |                              |
|-----------------------------------|--------------------------------------------------|------------------------------|
| Empirical formula                 | $C_{51.80}H_{57.40}Br_4Cl_9F_{20}N_4O_{2.80}S_4$ |                              |
| Formula weight                    | 1927.75                                          |                              |
| Temperature                       | 123(2) K                                         |                              |
| Wavelength                        | 0.71073 Å                                        |                              |
| Crystal system                    | Monoclinic                                       |                              |
| Space group                       | $P2_1/c$                                         |                              |
| Unit cell dimensions              | $a = 17.8941(5)$ Å                               | $\alpha = 90^\circ$ .        |
|                                   | $b = 10.1069(3)$ Å                               | $\beta = 101.532(2)^\circ$ . |
|                                   | $c = 10.1222(3)$ Å                               | $\gamma = 90^\circ$ .        |
| Volume                            | 1793.68(9) Å <sup>3</sup>                        |                              |
| Z                                 | 1                                                |                              |
| Density (calculated)              | 1.785 Mg/m <sup>3</sup>                          |                              |
| Absorption coefficient            | 2.791 mm <sup>-1</sup>                           |                              |
| F(000)                            | 956                                              |                              |
| Crystal size                      | 0.30 x 0.20 x 0.03 mm <sup>3</sup>               |                              |
| Theta range for data collection   | 2.88 to 25.02°.                                  |                              |
| Index ranges                      | -21 ≤ h ≤ 20, -8 ≤ k ≤ 12, -12 ≤ l ≤ 12          |                              |
| Reflections collected             | 18769                                            |                              |
| Independent reflections           | 3138 [R(int) = 0.0558]                           |                              |
| Completeness to theta = 25.02°    | 99.7 %                                           |                              |
| Absorption correction             | Semi-empirical from equivalents                  |                              |
| Max. and min. transmission        | 0.9209 and 0.4881                                |                              |
| Refinement method                 | Full-matrix least-squares on F <sup>2</sup>      |                              |
| Data / restraints / parameters    | 3138 / 2 / 244                                   |                              |
| Goodness-of-fit on F <sup>2</sup> | 1.034                                            |                              |
| Final R indices [I > 2σ(I)]       | R1 = 0.0377, wR2 = 0.0705                        |                              |
| R indices (all data)              | R1 = 0.0537, wR2 = 0.0757                        |                              |
| Largest diff. peak and hole       | 0.526 and -0.363 e.Å <sup>-3</sup>               |                              |

Restraints: DFIX (s = 0.02); EADP constraint utilized in solvent disorder

**Table S25. Crystal data and structure refinement for (20).**

|                                   |                                                                    |                                |
|-----------------------------------|--------------------------------------------------------------------|--------------------------------|
| Empirical formula                 | $C_{13}H_{20}ClF_5N_2O$                                            |                                |
| Formula weight                    | 350.76                                                             |                                |
| Temperature                       | 123(2) K                                                           |                                |
| Wavelength                        | 0.71073 Å                                                          |                                |
| Crystal system                    | Monoclinic                                                         |                                |
| Space group                       | $P2_1/c$                                                           |                                |
| Unit cell dimensions              | $a = 12.7577(2)$ Å                                                 | $\alpha = 90^\circ$ .          |
|                                   | $b = 8.8912(2)$ Å                                                  | $\beta = 112.3260(10)^\circ$ . |
|                                   | $c = 15.3866(3)$ Å                                                 | $\gamma = 90^\circ$ .          |
| Volume                            | $1614.49(5)$ Å <sup>3</sup>                                        |                                |
| Z                                 | 4                                                                  |                                |
| Density (calculated)              | 1.443 Mg/m <sup>3</sup>                                            |                                |
| Absorption coefficient            | 0.290 mm <sup>-1</sup>                                             |                                |
| F(000)                            | 728                                                                |                                |
| Crystal size                      | 0.30 x 0.27 x 0.20 mm <sup>3</sup>                                 |                                |
| Theta range for data collection   | 2.70 to 25.25°.                                                    |                                |
| Index ranges                      | $-15 \leq h \leq 15$ , $-10 \leq k \leq 10$ , $-18 \leq l \leq 18$ |                                |
| Reflections collected             | 5629                                                               |                                |
| Independent reflections           | 2931 [R(int) = 0.0159]                                             |                                |
| Completeness to theta = 25.25°    | 99.9 %                                                             |                                |
| Absorption correction             | Semi-empirical from equivalents                                    |                                |
| Max. and min. transmission        | 0.9443 and 0.9181                                                  |                                |
| Refinement method                 | Full-matrix least-squares on F <sup>2</sup>                        |                                |
| Data / restraints / parameters    | 2931 / 2 / 205                                                     |                                |
| Goodness-of-fit on F <sup>2</sup> | 1.045                                                              |                                |
| Final R indices [I > 2σ(I)]       | R1 = 0.0311, wR2 = 0.0721                                          |                                |
| R indices (all data)              | R1 = 0.0365, wR2 = 0.0750                                          |                                |
| Largest diff. peak and hole       | 0.236 and -0.203 e.Å <sup>-3</sup>                                 |                                |

*Restraints: DFIX (s = 0.02)*

**Table S26. Crystal data and structure refinement for (21).**

|                                   |                                                                    |                       |
|-----------------------------------|--------------------------------------------------------------------|-----------------------|
| Empirical formula                 | $C_{12}H_7F_5IN_3O$                                                |                       |
| Formula weight                    | 431.11                                                             |                       |
| Temperature                       | 123(2) K                                                           |                       |
| Wavelength                        | 0.71073 Å                                                          |                       |
| Crystal system                    | Orthorhombic                                                       |                       |
| Space group                       | $P2_12_12_1$                                                       |                       |
| Unit cell dimensions              | $a = 9.7161(3)$ Å                                                  | $\alpha = 90^\circ$ . |
|                                   | $b = 11.9730(3)$ Å                                                 | $\beta = 90^\circ$ .  |
|                                   | $c = 12.5893(3)$ Å                                                 | $\gamma = 90^\circ$ . |
| Volume                            | $1464.52(7)$ Å <sup>3</sup>                                        |                       |
| Z                                 | 4                                                                  |                       |
| Density (calculated)              | 1.955 Mg/m <sup>3</sup>                                            |                       |
| Absorption coefficient            | 2.245 mm <sup>-1</sup>                                             |                       |
| F(000)                            | 824                                                                |                       |
| Crystal size                      | 0.29 x 0.11 x 0.10 mm <sup>3</sup>                                 |                       |
| Theta range for data collection   | 2.65 to 25.24°.                                                    |                       |
| Index ranges                      | $-11 \leq h \leq 11$ , $-14 \leq k \leq 13$ , $-14 \leq l \leq 15$ |                       |
| Reflections collected             | 18585                                                              |                       |
| Independent reflections           | 2647 [R(int) = 0.0391]                                             |                       |
| Completeness to theta = 25.24°    | 99.9 %                                                             |                       |
| Absorption correction             | Semi-empirical from equivalents                                    |                       |
| Max. and min. transmission        | 0.8066 and 0.5621                                                  |                       |
| Refinement method                 | Full-matrix least-squares on F <sup>2</sup>                        |                       |
| Data / restraints / parameters    | 2647 / 5 / 211                                                     |                       |
| Goodness-of-fit on F <sup>2</sup> | 1.051                                                              |                       |
| Final R indices [I > 2σ(I)]       | R1 = 0.0196, wR2 = 0.0479                                          |                       |
| R indices (all data)              | R1 = 0.0204, wR2 = 0.0482                                          |                       |
| Absolute structure parameter      | 0.075(19)                                                          |                       |
| Largest diff. peak and hole       | 0.298 and -0.365 e.Å <sup>-3</sup>                                 |                       |

Restraints: DFIX (s = 0.02)

## Determination of the anion position relative to the electron-deficient arene

In order to compare the positions of the anions in respect to the aromatic moiety a generalized Cartesian system was used. The arene was placed in the x-z-plane centered in the origin (see figure b). For each anion the distance of the anion in respect to the plane (y-coordinates) was determined from the obtained crystal structures. By measuring the distances between the anions and C<sub>2</sub>, C<sub>4</sub> and C<sub>6</sub> the x- and z-coordinate were calculated. The obtained positions are listed in the following table.

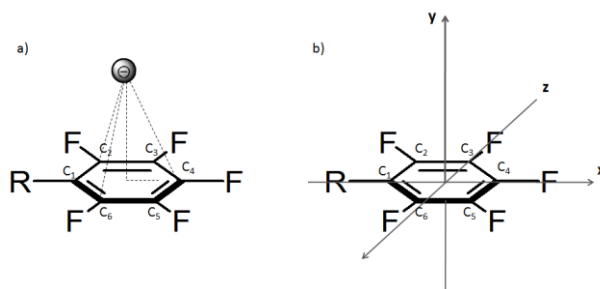

**Table S27. Determined position of the anion relative to the fluorinated arene.**

| Anion | x      | y      | z      |
|-------|--------|--------|--------|
| Cl12  | -2.057 | 3.294  | 1.997  |
| Cl13  | 1.980  | 3.247  | -1.262 |
| Cl14  | -0.037 | 3.370  | 0.468  |
| Cl15  | -0.120 | 3.312  | -1.035 |
| Cl16  | -3.276 | -0.466 | -3.704 |
| Cl17  | -0.010 | 3.586  | 0.278  |
| Cl18  | -3.065 | 2.868  | -2.461 |
| Cl19  | -2.042 | 3.012  | -2.603 |
| Br20  | 0.736  | 3.453  | 1.923  |
| Br21  | 1.214  | 3.391  | -1.452 |
| Br22  | -2.008 | 0.741  | -4.812 |
| Br22  | -0.753 | 3.579  | -0.389 |
| Br24  | -4.739 | -0.578 | -3.336 |
| Br25  | -0.734 | 3.420  | -1.803 |
| Br26  | 0.021  | 3.517  | 0.569  |
| Br27  | -5.021 | -0.642 | -3.822 |
| Br28  | 0.261  | 3.467  | -0.928 |
| Br29  | 0.444  | 3.808  | 1.314  |
| Br30  | 0.038  | 3.569  | -0.119 |
| Br31  | -0.386 | 3.765  | -0.547 |
| Br32  | -0.478 | 4.081  | 0.808  |
| Br33  | -0.500 | 3.756  | 2.495  |
| Br34  | 0.261  | 3.470  | -1.999 |
| Br35  | -0.622 | 3.644  | 2.479  |
| Br36  | -0.336 | 3.463  | 1.431  |
| Br37  | -4.247 | -0.251 | 3.536  |
| Br38  | 0.532  | 3.520  | -1.097 |
| Br39  | 0.777  | 3.409  | 0.071  |



|      |        |        |        |
|------|--------|--------|--------|
| Br40 | -1.405 | 5.010  | -3.042 |
| Br41 | -3.099 | 0.002  | 4.184  |
| Br42 | -3.120 | -1.503 | 3.688  |
| Br43 | -3.423 | -0.865 | -3.602 |
| Br44 | -0.479 | 3.471  | 3.299  |
| Br45 | 0.091  | 3.547  | 0.876  |
| Br46 | 0.029  | 3.614  | 2.983  |
| Br47 | 0.737  | 3.394  | -0.772 |
| Br48 | -0.080 | 3.749  | 0.472  |
| Br49 | 0.181  | 3.290  | 2.192  |
| Br50 | 0.276  | 3.492  | 0.903  |
| Br51 | 0.553  | 3.380  | -1.373 |
| Br52 | 0.651  | 3.401  | 0.042  |
| Br53 | 0.403  | 3.378  | 1.791  |
| Br54 | 0.835  | 3.417  | -0.536 |
| Br55 | 0.338  | 3.428  | -0.050 |
| Br56 | 3.365  | -1.117 | -3.434 |
| Br57 | 5.004  | 0.302  | -0.574 |
| Br58 | -1.039 | 4.417  | -1.292 |
| Br59 | 3.002  | 3.454  | 1.824  |
| Br60 | 0.064  | 3.461  | -0.287 |
| Br61 | 0.306  | 3.424  | -0.589 |
| Br62 | 0.381  | 3.498  | -2.060 |
| Br63 | 0.424  | 3.808  | 1.365  |
| Br64 | 0.266  | 3.484  | -0.885 |
| Br65 | 0.692  | 3.585  | -1.362 |
| Br66 | -0.706 | 3.587  | 1.422  |
| Br67 | 0.814  | 3.367  | 0.340  |
| Br68 | -1.316 | 3.727  | 2.031  |
| Br69 | -1.206 | -3.276 | -2.141 |
| Br70 | 0.000  | 3.213  | 2.097  |
| Br71 | -0.036 | 3.657  | 0.190  |
| Br72 | 0.150  | 3.653  | -0.346 |
| Br73 | -4.077 | 0.961  | 3.554  |
| Br74 | -3.162 | 2.965  | 2.637  |
| Br75 | -2.447 | 3.156  | 2.555  |
| Br76 | 0.387  | 3.595  | 0.561  |
| Br77 | 0.209  | 3.826  | 0.546  |
| I78  | 0.183  | 3.839  | -0.123 |
| I79  | 0.135  | 3.906  | 0.537  |
| I80  | 0.157  | 4.180  | -1.189 |
| I81  | 0.399  | 3.927  | 1.722  |
| I82  | 0.457  | 3.629  | -0.171 |
| I83  | 0.234  | 3.772  | 0.003  |
| I84  | -0.603 | 3.830  | -2.151 |
| I85  | -0.344 | 3.720  | -0.861 |

|       |        |        |        |
|-------|--------|--------|--------|
| I86   | -1.523 | 3.552  | -0.123 |
| I87   | -0.208 | -3.571 | 0.681  |
| I88   | 1.494  | 3.595  | 0.346  |
| I89   | -0.203 | 3.617  | -0.247 |
| I90   | 0.480  | 4.302  | -1.545 |
| I91   | 0.473  | 3.490  | 2.408  |
| I92   | -0.555 | -3.887 | -0.624 |
| I93   | 0.990  | 3.721  | 1.543  |
| I94   | 1.972  | 3.413  | -1.220 |
| I95   | 0.261  | 3.730  | 0.536  |
| Co96  | 0.752  | 3.933  | 0.611  |
| Co97  | 0.855  | 3.897  | -1.388 |
| Co98  | 0.447  | 4.374  | 1.363  |
| Co99  | 0.164  | 3.020  | -4.026 |
| Co100 | 1.082  | 3.831  | 1.559  |
| Co101 | -0.422 | 3.025  | -0.757 |
| Co102 | 1.367  | 3.555  | -0.649 |
| Co103 | 2.183  | 3.981  | 0.156  |
| Co104 | -0.498 | 3.825  | -2.117 |
| Co105 | -0.494 | 4.102  | -1.758 |
| Co106 | -0.011 | 3.892  | 0.522  |
| Co107 | 0.451  | 3.852  | -0.027 |
| Co108 | 0.713  | 3.703  | -0.065 |
| Co109 | 0.147  | 4.010  | 0.481  |
| Co110 | -0.162 | 4.028  | 0.708  |
| Co111 | -1.705 | -4.954 | 0.910  |
| Co112 | 0.533  | 3.816  | 2.220  |

### III. References

- <sup>1</sup> M. Giese, M. Albrecht, K. Wiemer, A. Valkonen, K. Rissanen, *New J. Chem.* **2012**, 1368-1372.
- <sup>2</sup> M. Albrecht, M. Müller, O. Mergel, K. Rissanen, A. Valkonen, *Chem. Eur. J.* **2010**, *16*, 5062.
- <sup>3</sup> M. Giese, M. Albrecht, C. Plum, D. Hintzen, A. Valkonen, K. Rissanen, *Supramol. Chem.* **2012**, *24*, 755-761.
- <sup>4</sup> M. Albrecht, M. Müller, A. Valkonen, K. Rissanen, *Cryst. Eng. Commun.* **2010**, *12*, 3698.
- <sup>5</sup> M. Giese, M. Albrecht, C. Bannwarth, G. Raabe, A. Valkonen, K. Rissanen, *Chem. Commun.* **2011**, *47*, 8542.
- <sup>6</sup> M. Giese, M. Albrecht, T. Krappitz, M. Peters, V. Gossen, G. Raabe, A. Valkonen, K. Rissanen, *Chem. Commun.* **2012**, *48*, 9983-9985.
- <sup>7</sup> M. Giese, M. Albrecht, T. Repenko, J. Sackmann, A. Valkonen, K. Rissanen, *Eur. J. Org. Chem.* **2014**, *accepted for publication*. DOI: 10.1002/ejoc.201301336
- <sup>8</sup> M. Giese, M. Albrecht, K. Wiemer, G. Kubik, A. Valkonen, K. Rissanen, *Eur. J. Inorg. Chem.* **2012**, 2995-2999.
- <sup>9</sup> M. Giese, M. Albrecht, S. Steike, A. Ackermann, A. Valkonen, K. Rissanen, *Inorg. Chem.* **2013**, *52*, 7666-7672.
- <sup>10</sup> M. Müller, M. Albrecht, V. Gossen, T. Peters, A. Hoffmann, G. Raabe, A. Valkonen, K. Rissanen, *Chem. Eur. J.* **2010**, *16*, 12446.
- <sup>11</sup> M. Giese, M. Albrecht, A. Valkonen, K. Rissanen, *Eur. J. Org. Chem.* **2013**, 3247-3253.
- <sup>12</sup> M. Müller, M. Albrecht, J. Sackmann, A. Hoffmann, F. Dierkes, A. Valkonen, K. Rissanen, *Dalton Trans.* **2010**, *39*, 11329.
- <sup>13</sup> M. Giese, M. Albrecht, C. Bohnen, T. Repenko, A. Valkonen, K. Rissanen, *Dalton Trans.* **2013**, *accepted for publication*.
- <sup>14</sup> M. Giese, M. Albrecht, G. Ivanova, A. Valkonen, K. Rissanen, *Supramol. Chem.* **2012**, *1*, 48-55.

---

<sup>10</sup> a) COLLECT, Bruker AXS, Inc., Madison, Wisconsin, USA, **2008**; b) Z. Otwinowski, W. Minor, in *Methods Enzymol.* **1997**, 276, Macromolecular Crystallography, Part A, 307-326; c) M. C. Burla, R. Caliandro, M. Camalli, B. Carrozzini, G. L. Cascarano, L. De Caro, C. Giacovazzo, G. Polidori and R. Spagna, *J. Appl. Crystallogr.* **2005**, 38, 381-388; d) L. J. Farrugia, *J. Appl. Crystallogr.* **1999**, 32, 837-838; e) G. M. Sheldrick, *Acta Crystallogr., Sect. A: Found. Crystallogr.* **2008**, 64, 112-122; f) G. M. Sheldrick, *SADABS*, University of Göttingen, Germany, **1996**.
